# Supplementary material for: Isolation and Structural Elucidation of Chondrosterins F–H from the Marine Fungus Chondrostereum sp
Source: PubMed Central journal article supplement (PMC3640397; doi:10.3390/md11020551), 2013-02-22

## Supplementary Materials

- Figure S1.** HREIMS of chondrosterin F (1)  
**Figure S2.**  $^1\text{H}$  NMR (500 MHz,  $\text{CDCl}_3$ ) spectrum of chondrosterin F (1)  
**Figure S3.**  $^{13}\text{C}$  NMR (125 MHz,  $\text{CDCl}_3$ ) spectrum of chondrosterin F (1)  
**Figure S4.** gHMQC of chondrosterin F (1)  
**Figure S5.** gHMBC of chondrosterin F (1)  
**Figure S6.**  $^1\text{H}$ - $^1\text{H}$  gCOSY of chondrosterin F (1)  
**Figure S7.** ROESY of chondrosterin F (1)  
**Figure S8.**  $^1\text{H}$  NMR (500 MHz,  $\text{CDCl}_3$ ) spectrum of incarnal (2)  
**Figure S9.**  $^{13}\text{C}$  NMR (125 MHz,  $\text{CDCl}_3$ ) spectrum of incarnal (2)  
**Figure S10.**  $^1\text{H}$  NMR (500 MHz,  $\text{CDCl}_3$ ) spectrum of arthrosporone (3)  
**Figure S11.**  $^{13}\text{C}$  NMR (125 MHz,  $\text{CDCl}_3$ ) spectrum of arthrosporone (3)  
**Figure S12.**  $^1\text{H}$  NMR (500 MHz,  $\text{DMSO-}d_6$ ) spectrum of chondrosterin G (4)  
**Figure S13.**  $^{13}\text{C}$  NMR (125 MHz,  $\text{DMSO-}d_6$ ) spectrum of chondrosterin G (4)  
**Figure S14.** gHMQC spectrum of chondrosterin G (4)  
**Figure S15.** gHMBC spectrum of chondrosterin G (4)  
**Figure S16.**  $^1\text{H}$ - $^1\text{H}$  gCOSY spectrum of chondrosterin G (4)  
**Figure S17.**  $^1\text{H}$  NMR (400 MHz,  $\text{DMSO-}d_6$ ) spectrum of chondrosterin H (5)  
**Figure S18.**  $^{13}\text{C}$  NMR (100 MHz,  $\text{DMSO-}d_6$ ) spectrum of chondrosterin H (5)  
**Figure S19.**  $^1\text{H}$  NMR (500 MHz,  $\text{CDCl}_3$ ) spectrum of chondrosterin H (5)  
**Figure S20.**  $^{13}\text{C}$  NMR (125 MHz,  $\text{CDCl}_3$ ) spectrum of chondrosterin H (5)  
**Figure S21.**  $^1\text{H}$  NMR (500 MHz,  $\text{CDCl}_3$ ) spectrum of dehydromatricarianol (6)  
**Figure S22.**  $^{13}\text{C}$  NMR (125 MHz,  $\text{CDCl}_3$ ) spectrum of dehydromatricarianol (6)

SPECTRUM-MS

File: D:\DATA-HR\11\121413-sf2-c1.RAW

Full ms [254.100–269.700]-Range: 254.100–264.000

Scan No. 27 of 44

Scan #: 27

RT: 0.98

Data points: 2

| Mass     | Relative Intensity | Theoretical Mass | Delta [ppm] | Delta [mmu] | RDB | Composition                                    |
|----------|--------------------|------------------|-------------|-------------|-----|------------------------------------------------|
| 262.1202 | 25.2               | 262.1200         | 0.9         | 0.2         | 7.0 | C <sub>15</sub> H <sub>18</sub> O <sub>4</sub> |
| 263.1276 | 35.6               | 263.1278         | -0.8        | -0.2        | 6.5 | C <sub>15</sub> H <sub>19</sub> O <sub>4</sub> |

Figure S1. HREIMS of chondrosterin F (1).

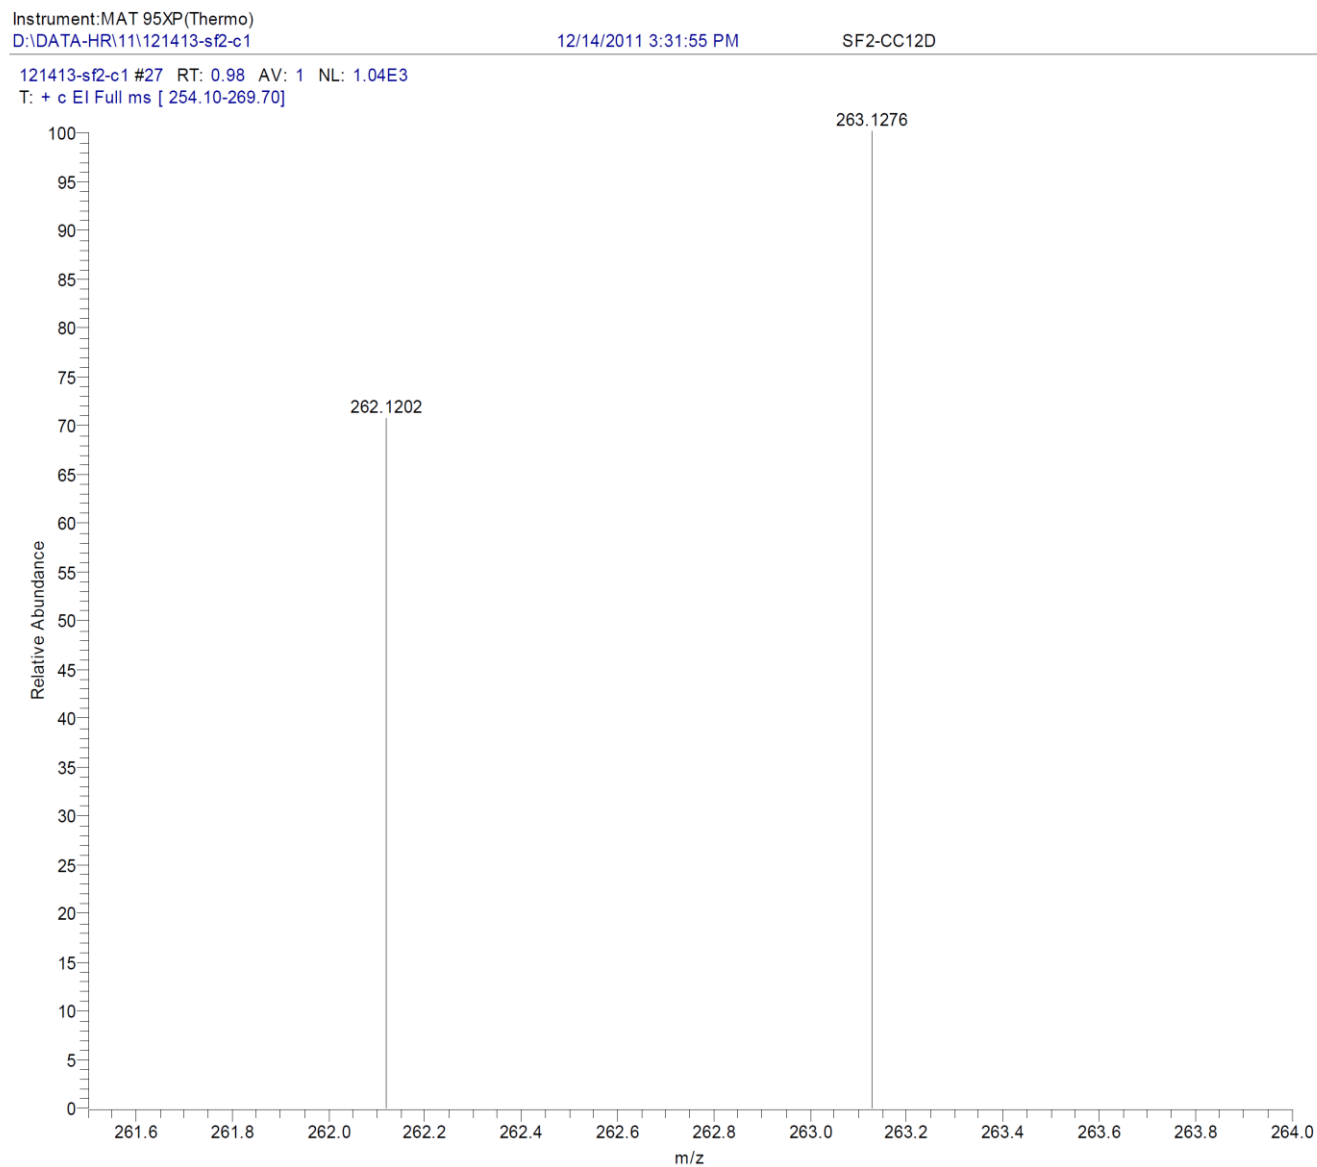

**Figure S2.**  $^1\text{H}$  NMR (500 MHz,  $\text{CDCl}_3$ ) spectrum of chondrosterin F (1).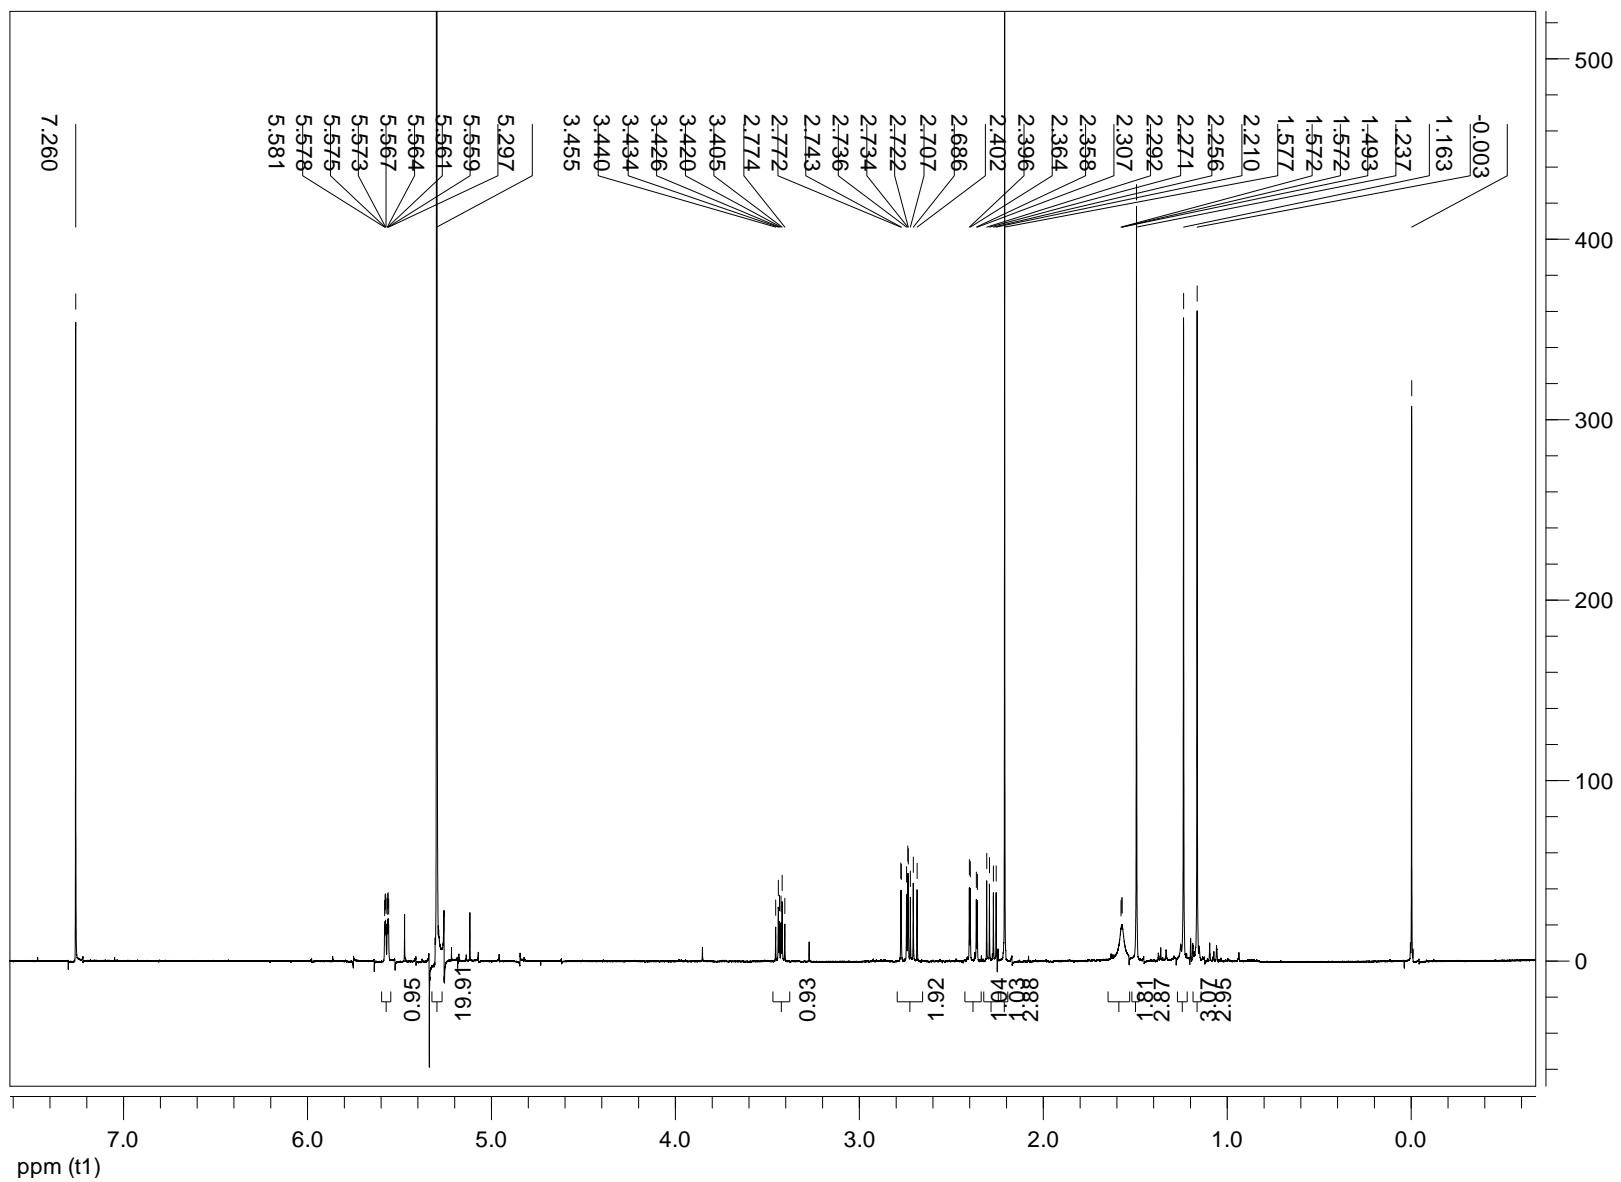

**Figure S3.**  $^{13}\text{C}$  NMR (125 MHz,  $\text{CDCl}_3$ ) spectrum of chondrosterin F (**1**).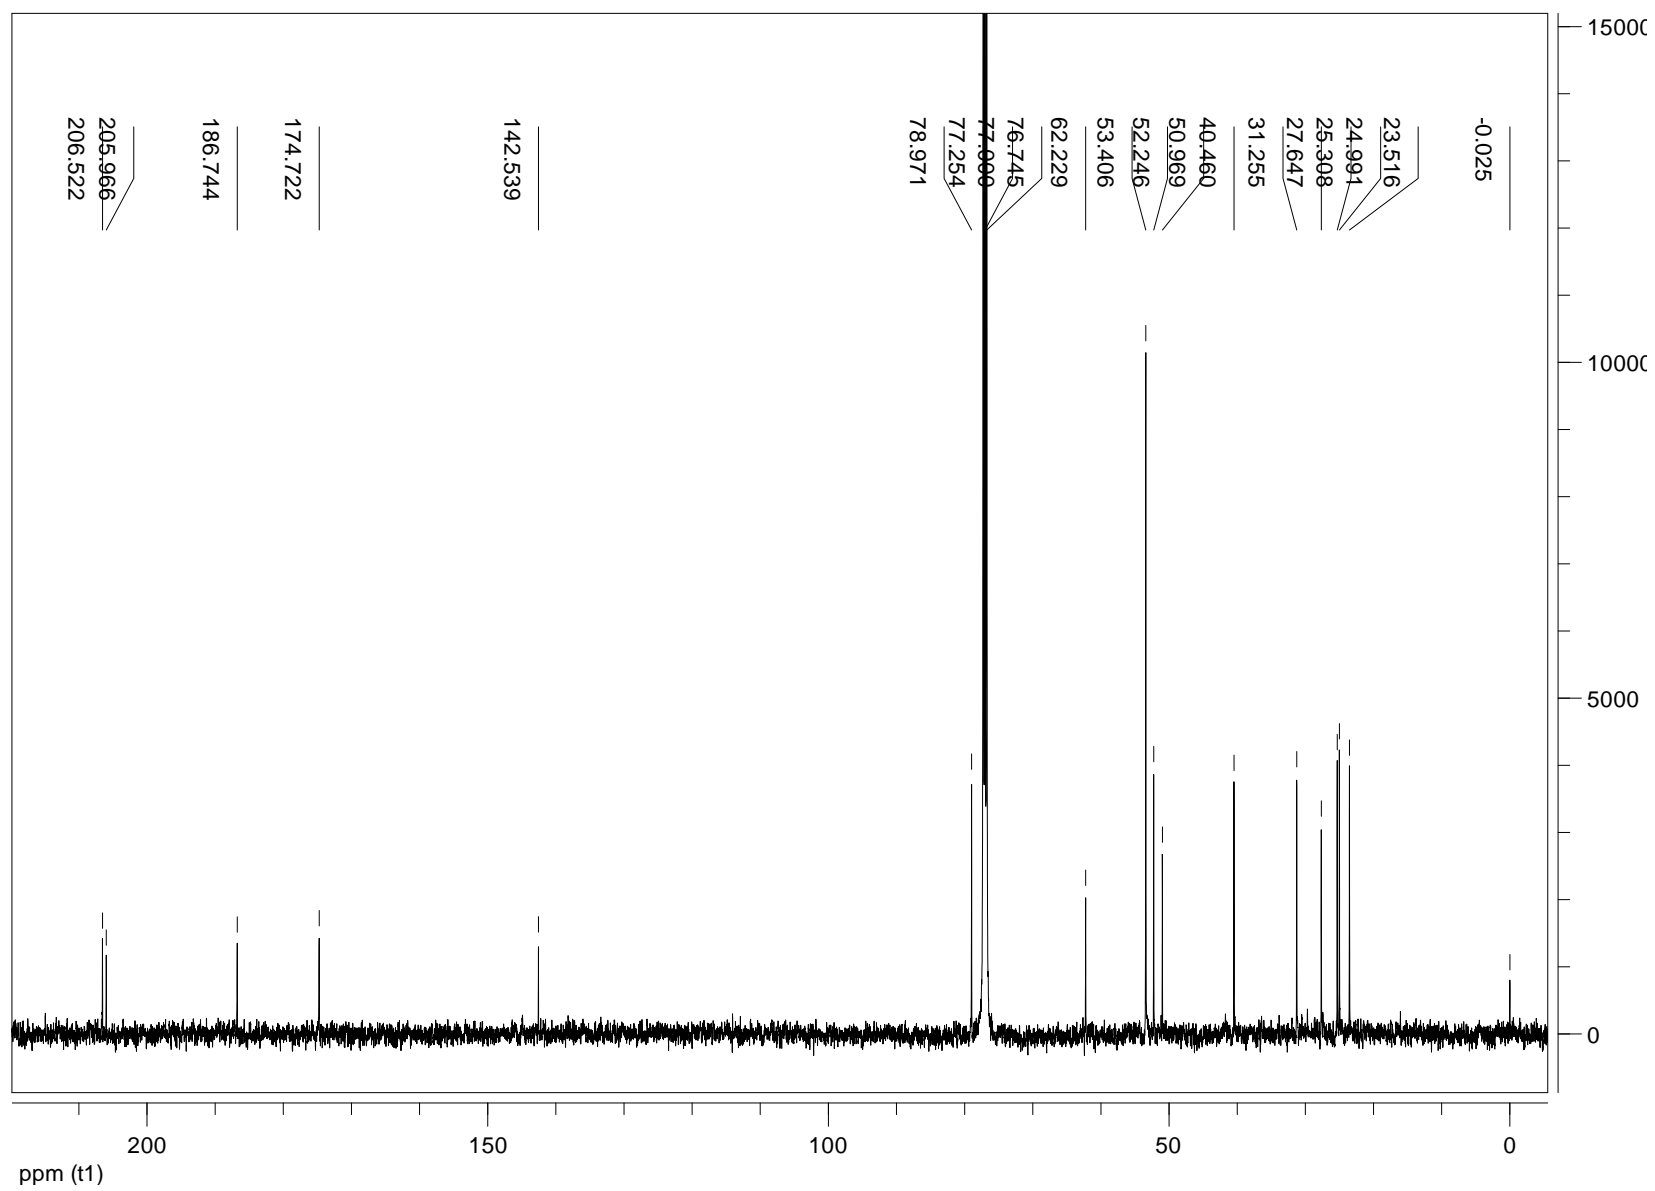

Figure S4. gHMQC of chondrosterin F (1).

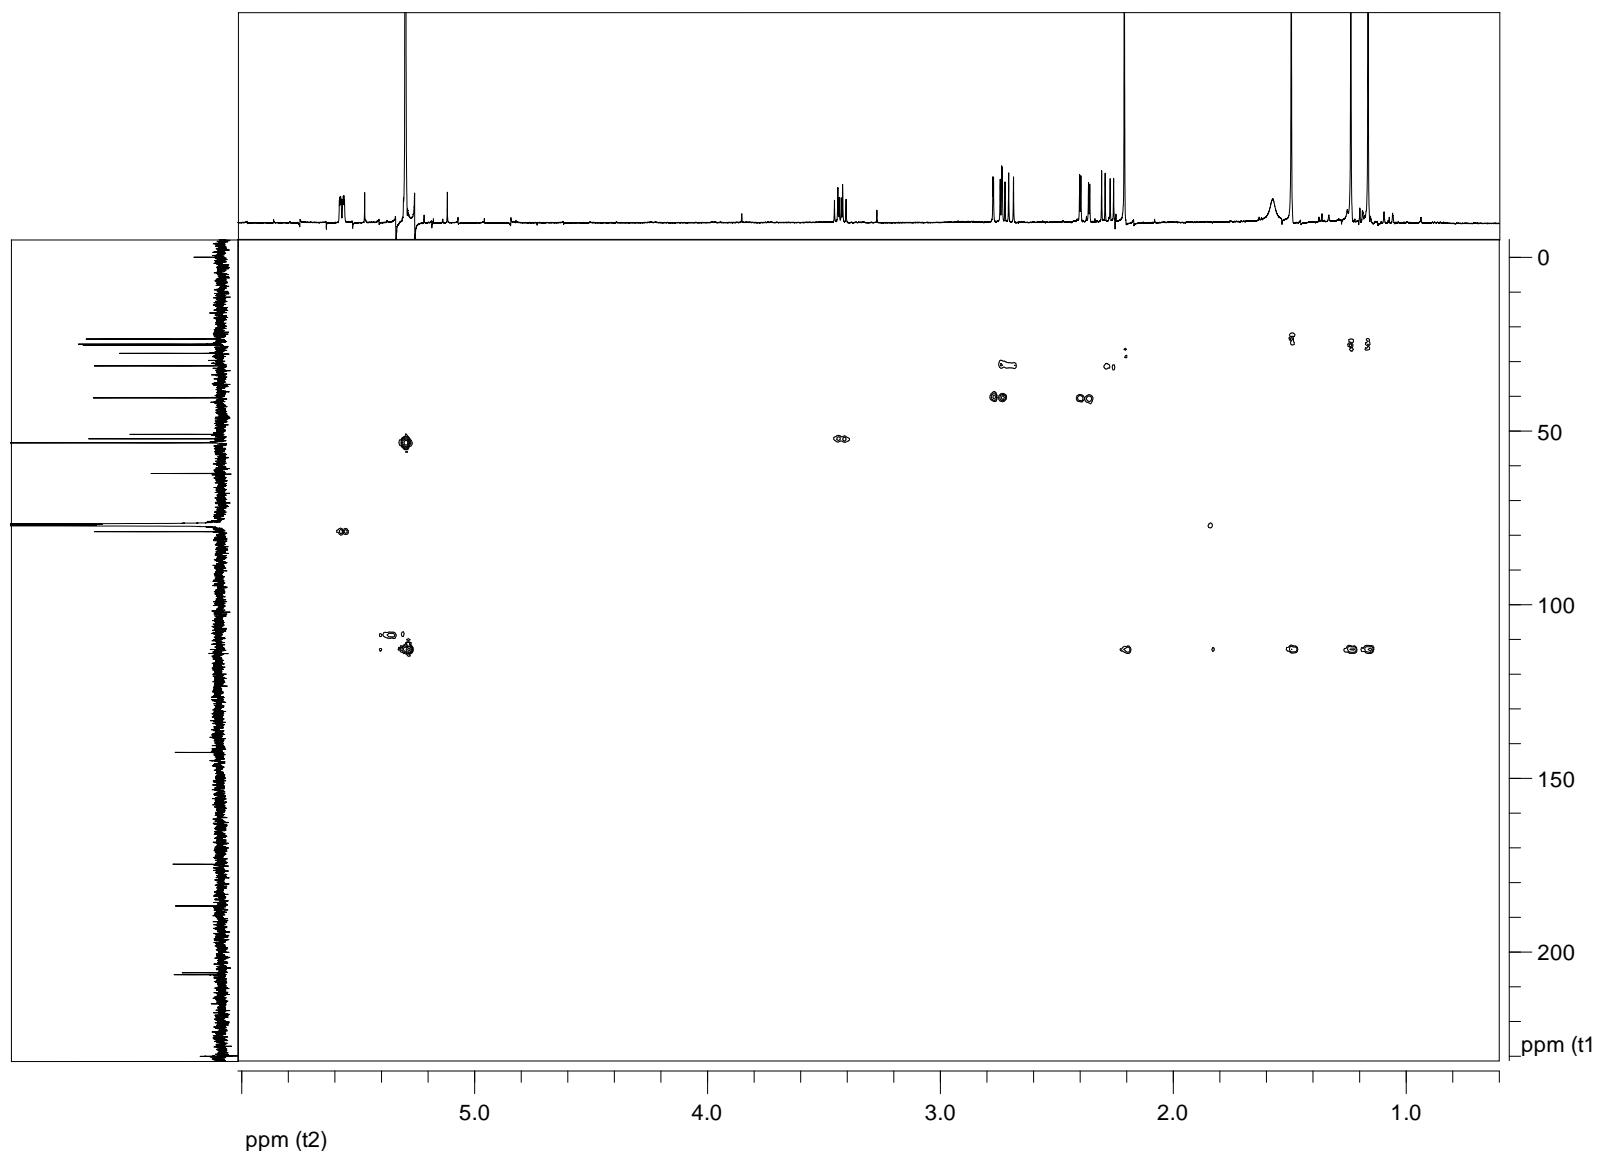

Figure S5. gHMBC of chondrosterin F (1).

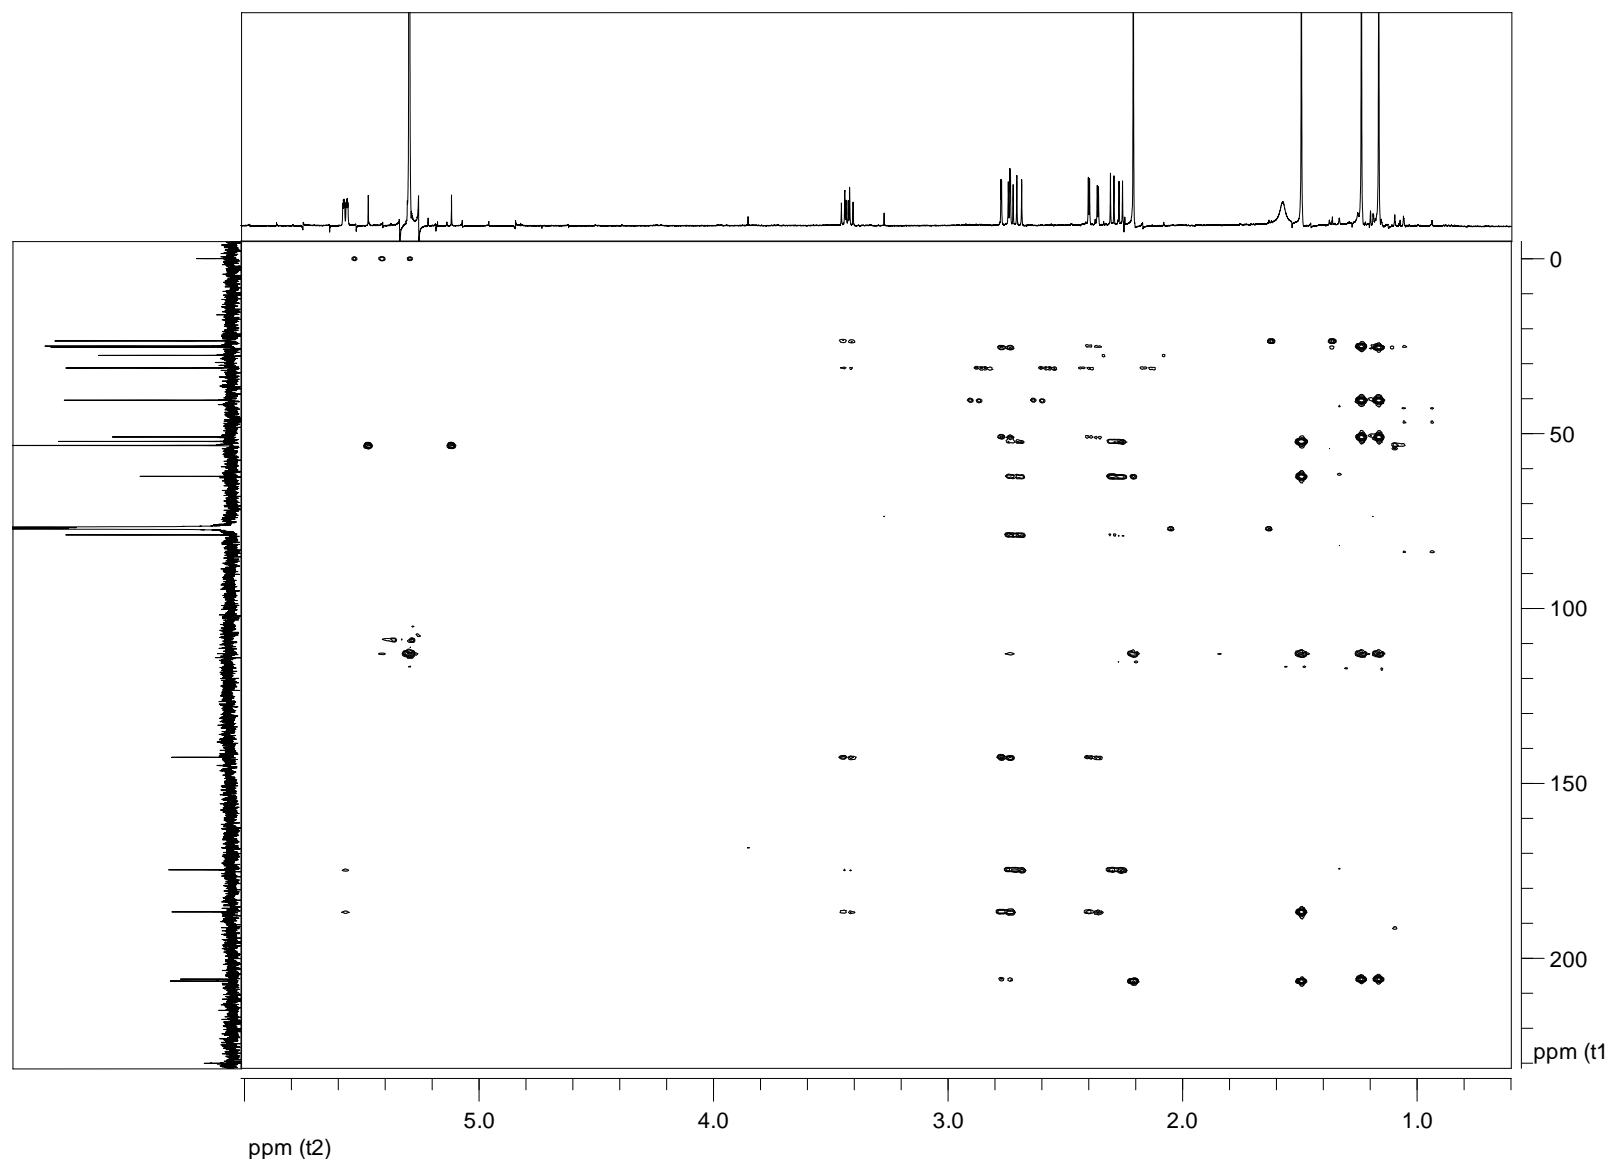

Figure S6.  $^1\text{H}$ - $^1\text{H}$  gCOSY of chondrosterin F (1).

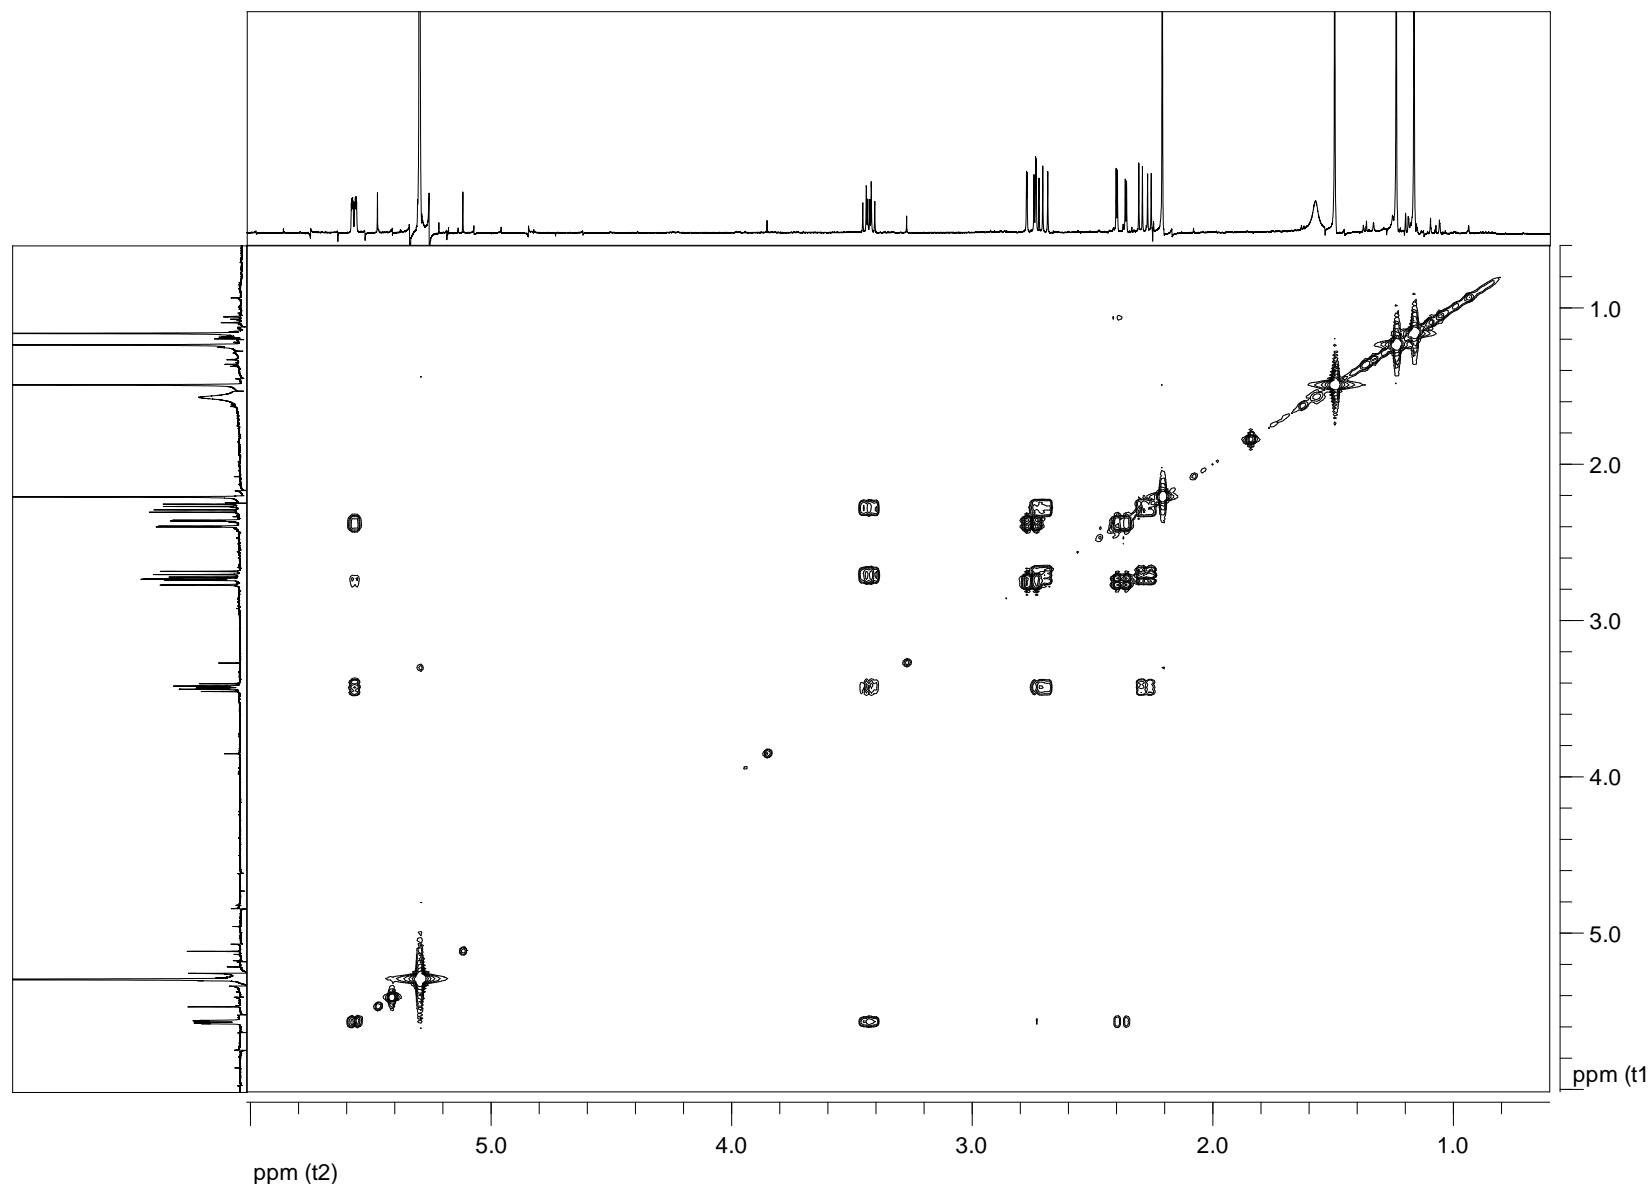



Figure S7. ROESY of chondrosterin F (1).

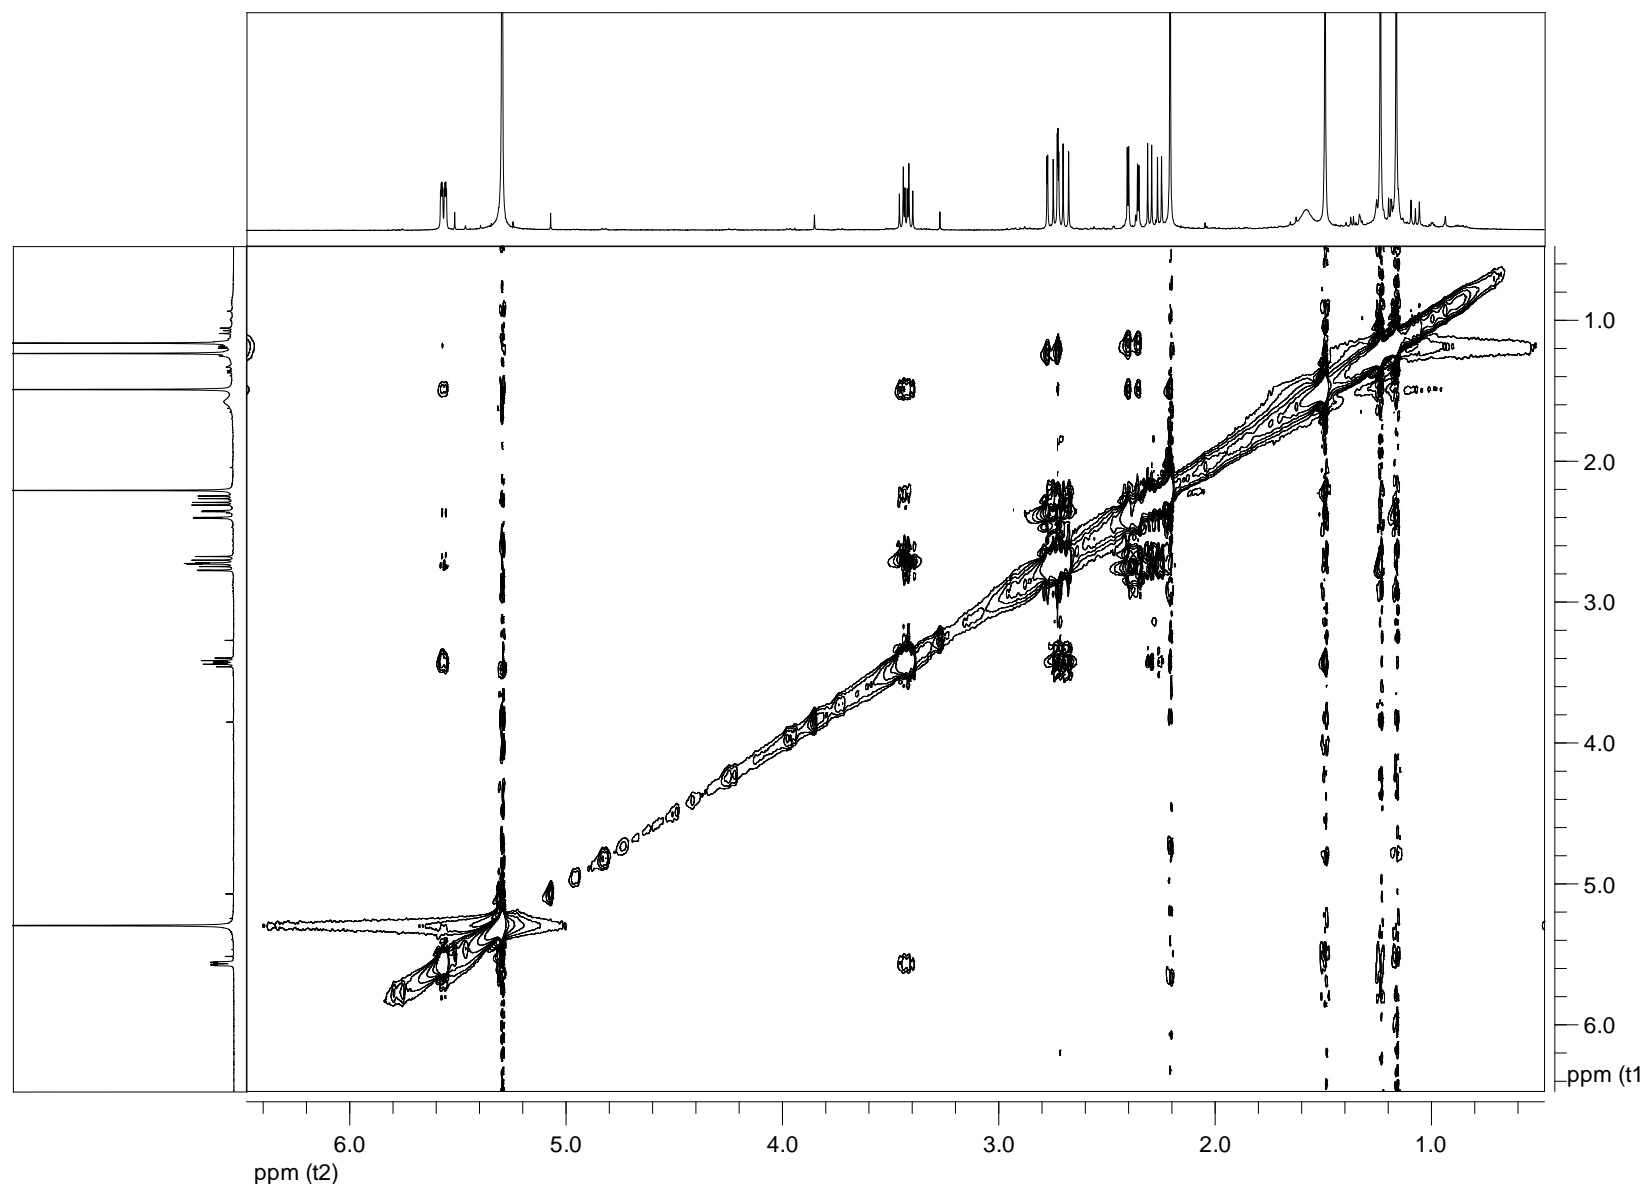

**Figure S8.**  $^1\text{H}$  NMR (500 MHz,  $\text{CDCl}_3$ ) spectrum of incarnal (**2**).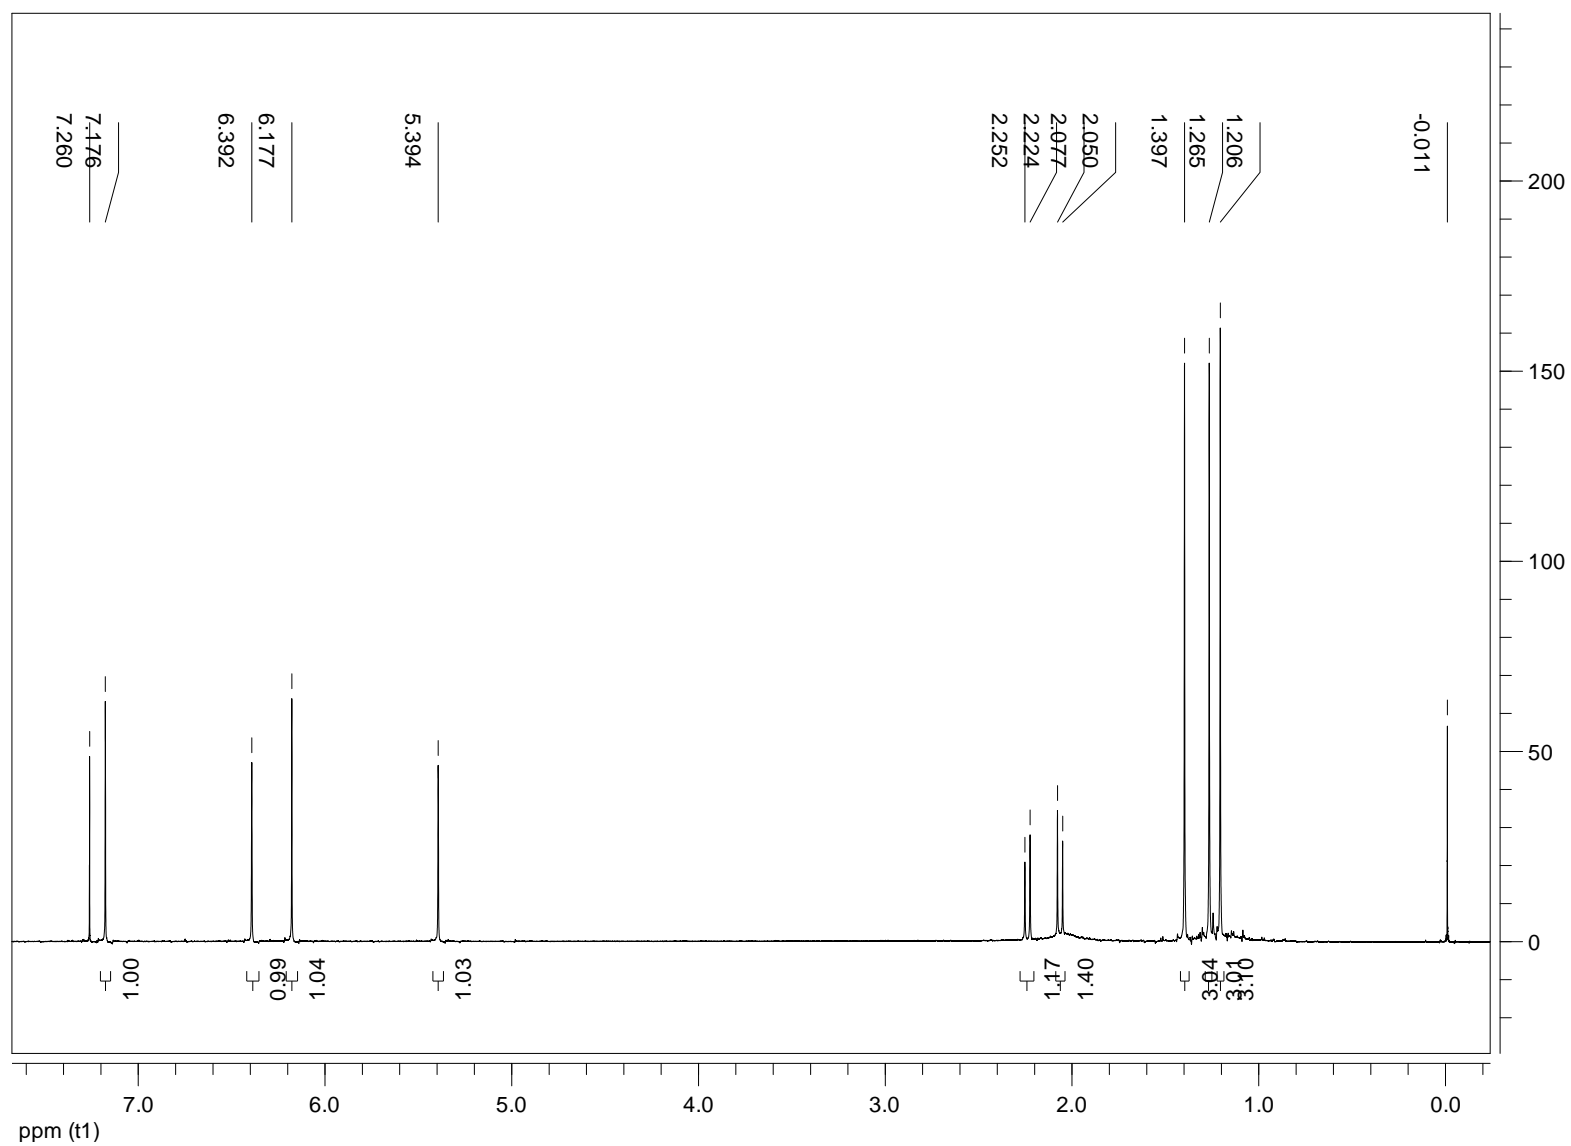

**Figure S9.**  $^{13}\text{C}$  NMR (125 MHz,  $\text{CDCl}_3$ ) spectrum of incarnal (2).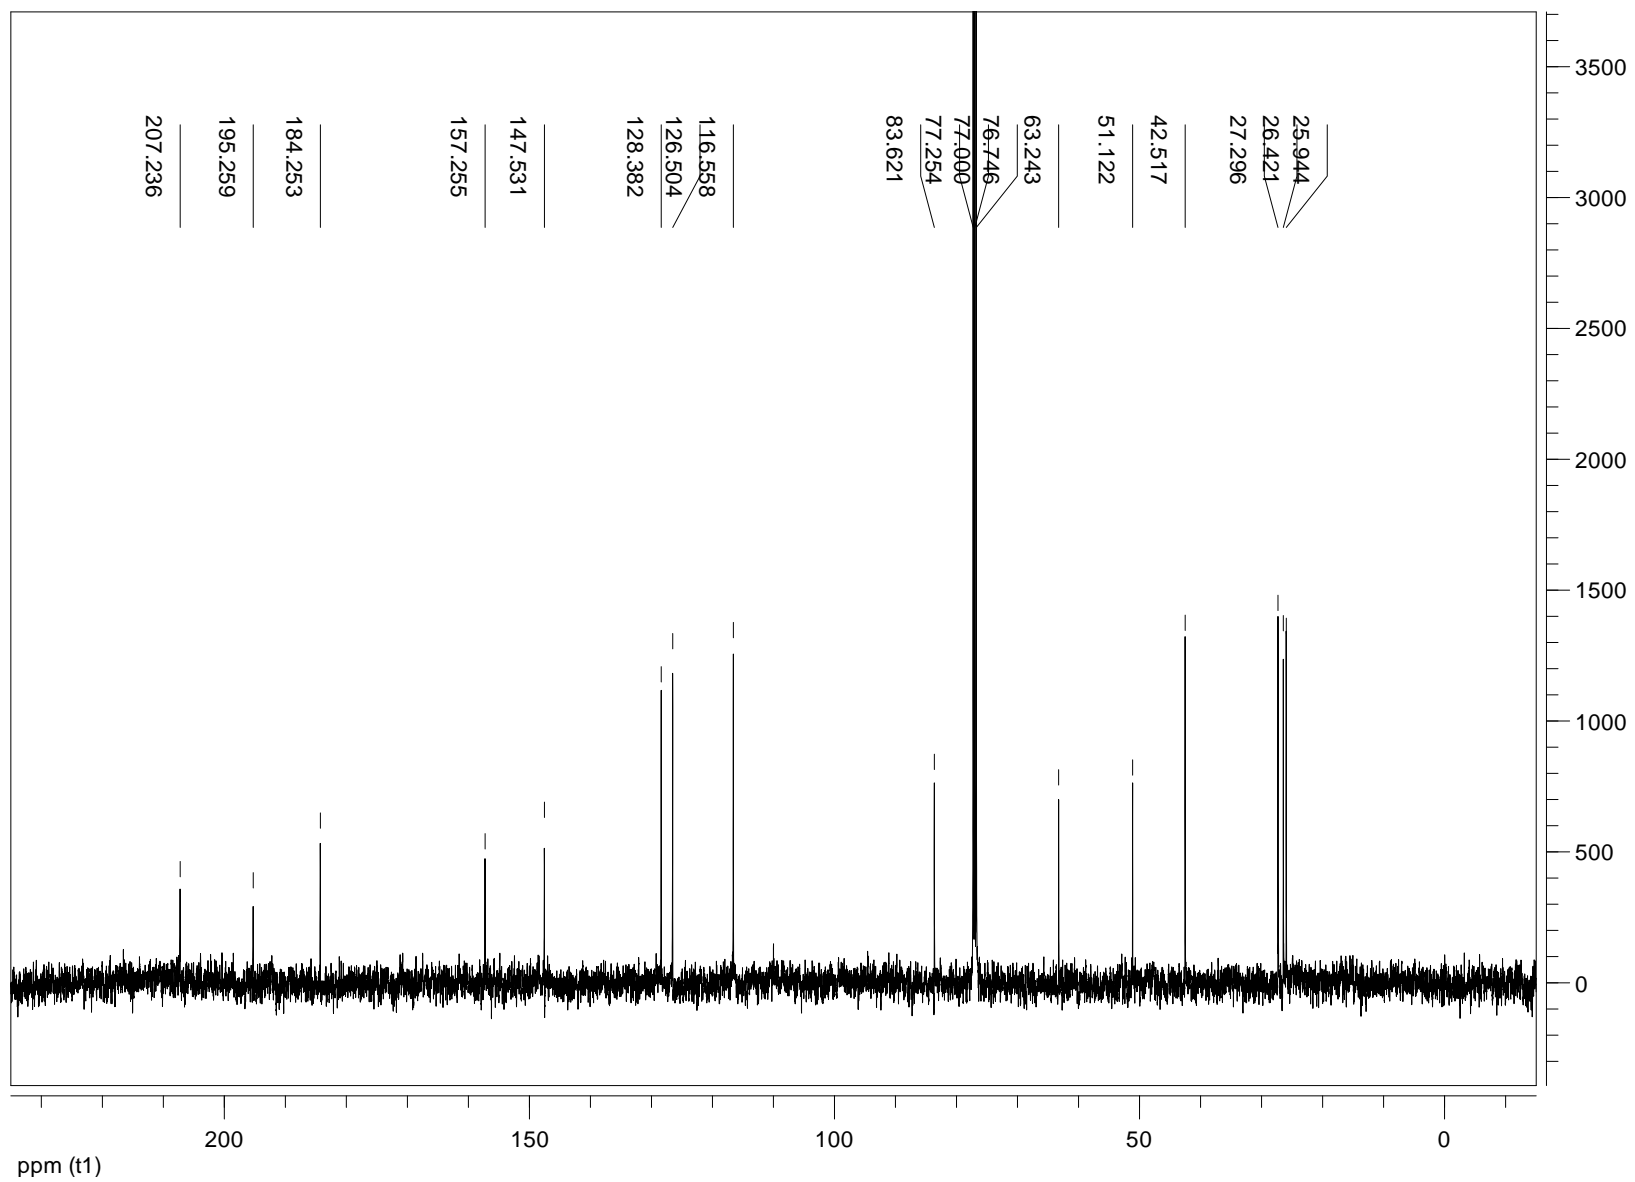

**Figure S10.**  $^1\text{H}$  NMR (500 MHz,  $\text{CDCl}_3$ ) spectrum of arthrosporone (**3**).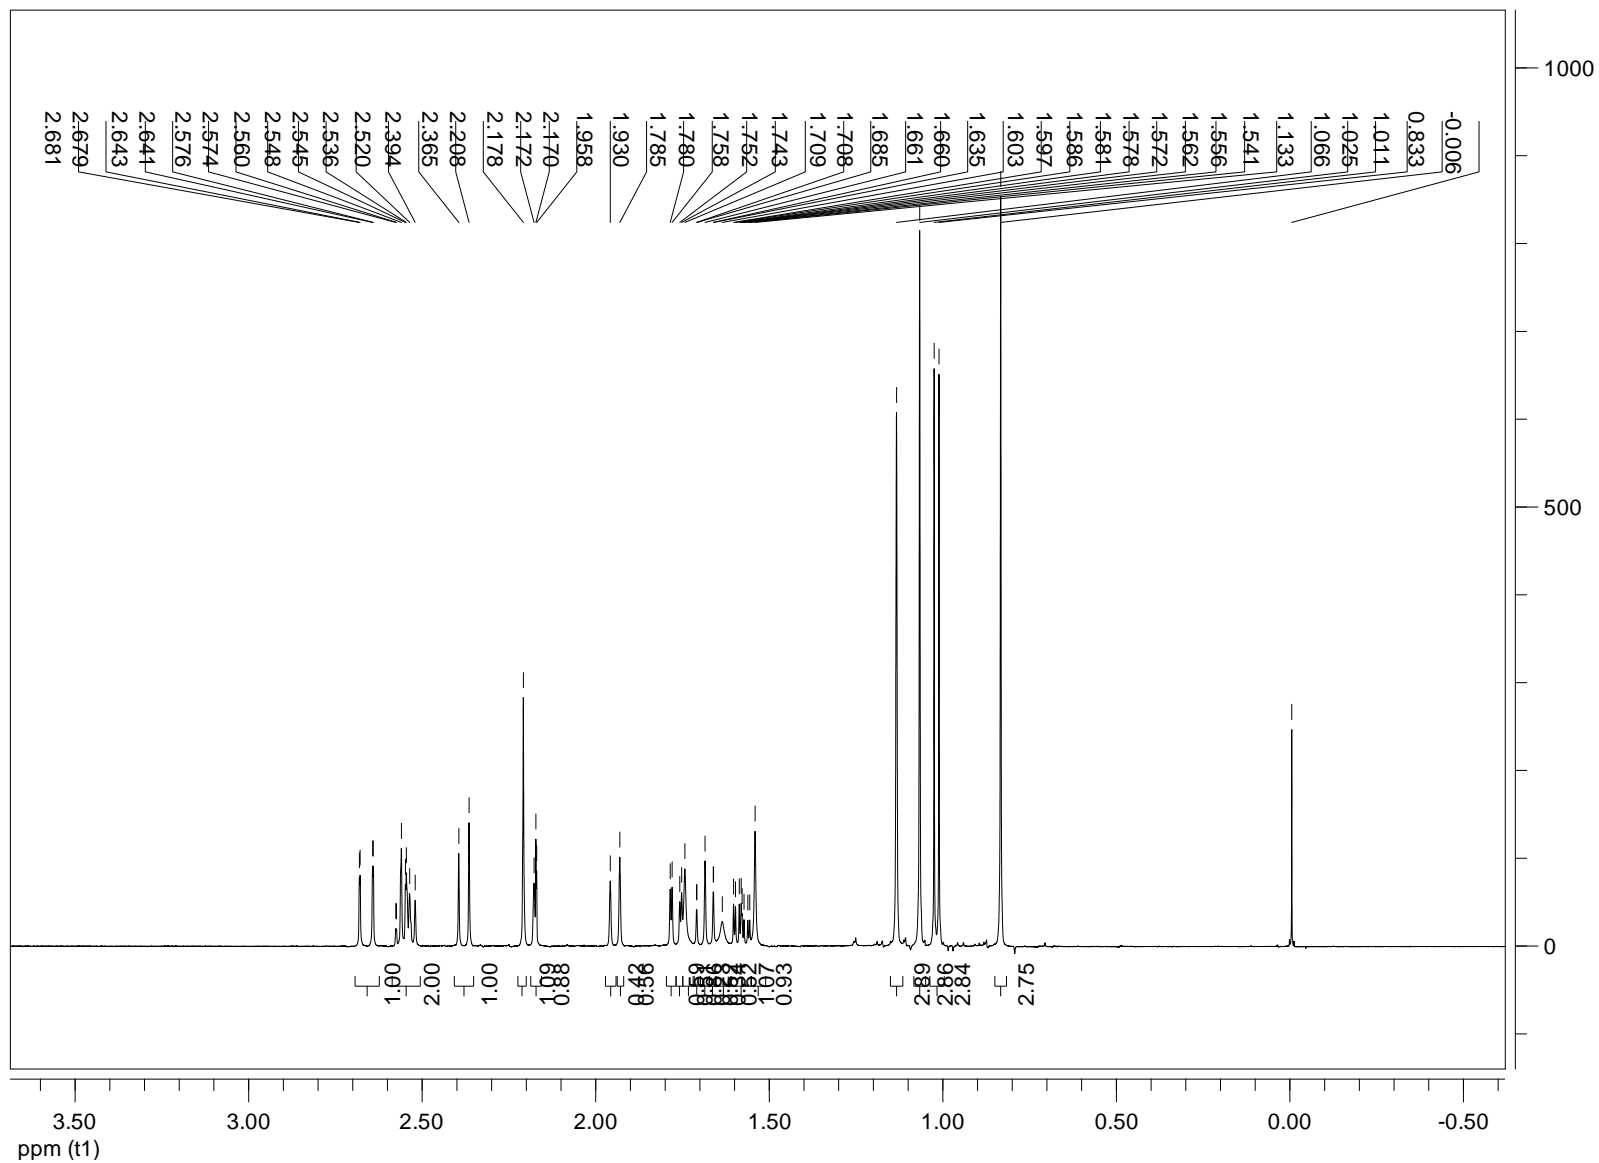

**Figure S11.**  $^{13}\text{C}$  NMR (125 MHz,  $\text{CDCl}_3$ ) spectrum of arthrosporone (**3**).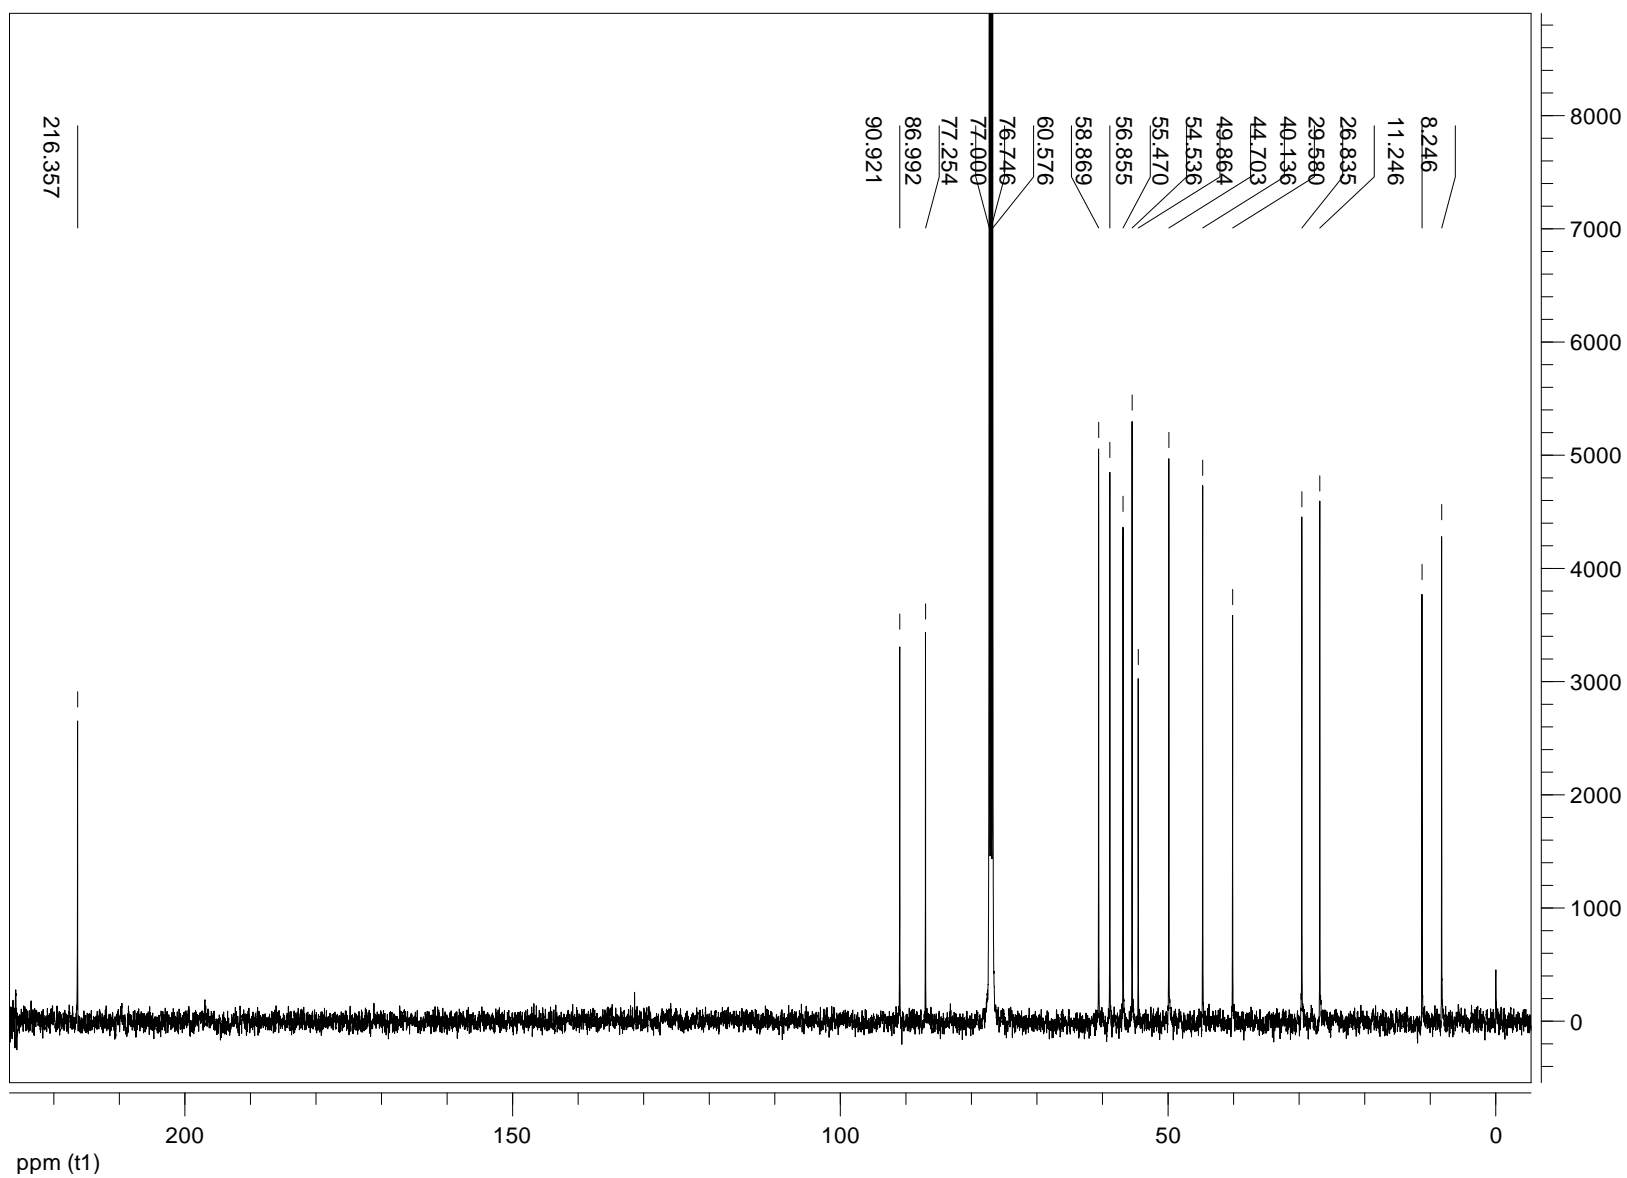

**Figure S12.**  $^1\text{H}$  NMR (500 MHz,  $\text{DMSO-}d_6$ ) spectrum of chondrosterin G (**4**).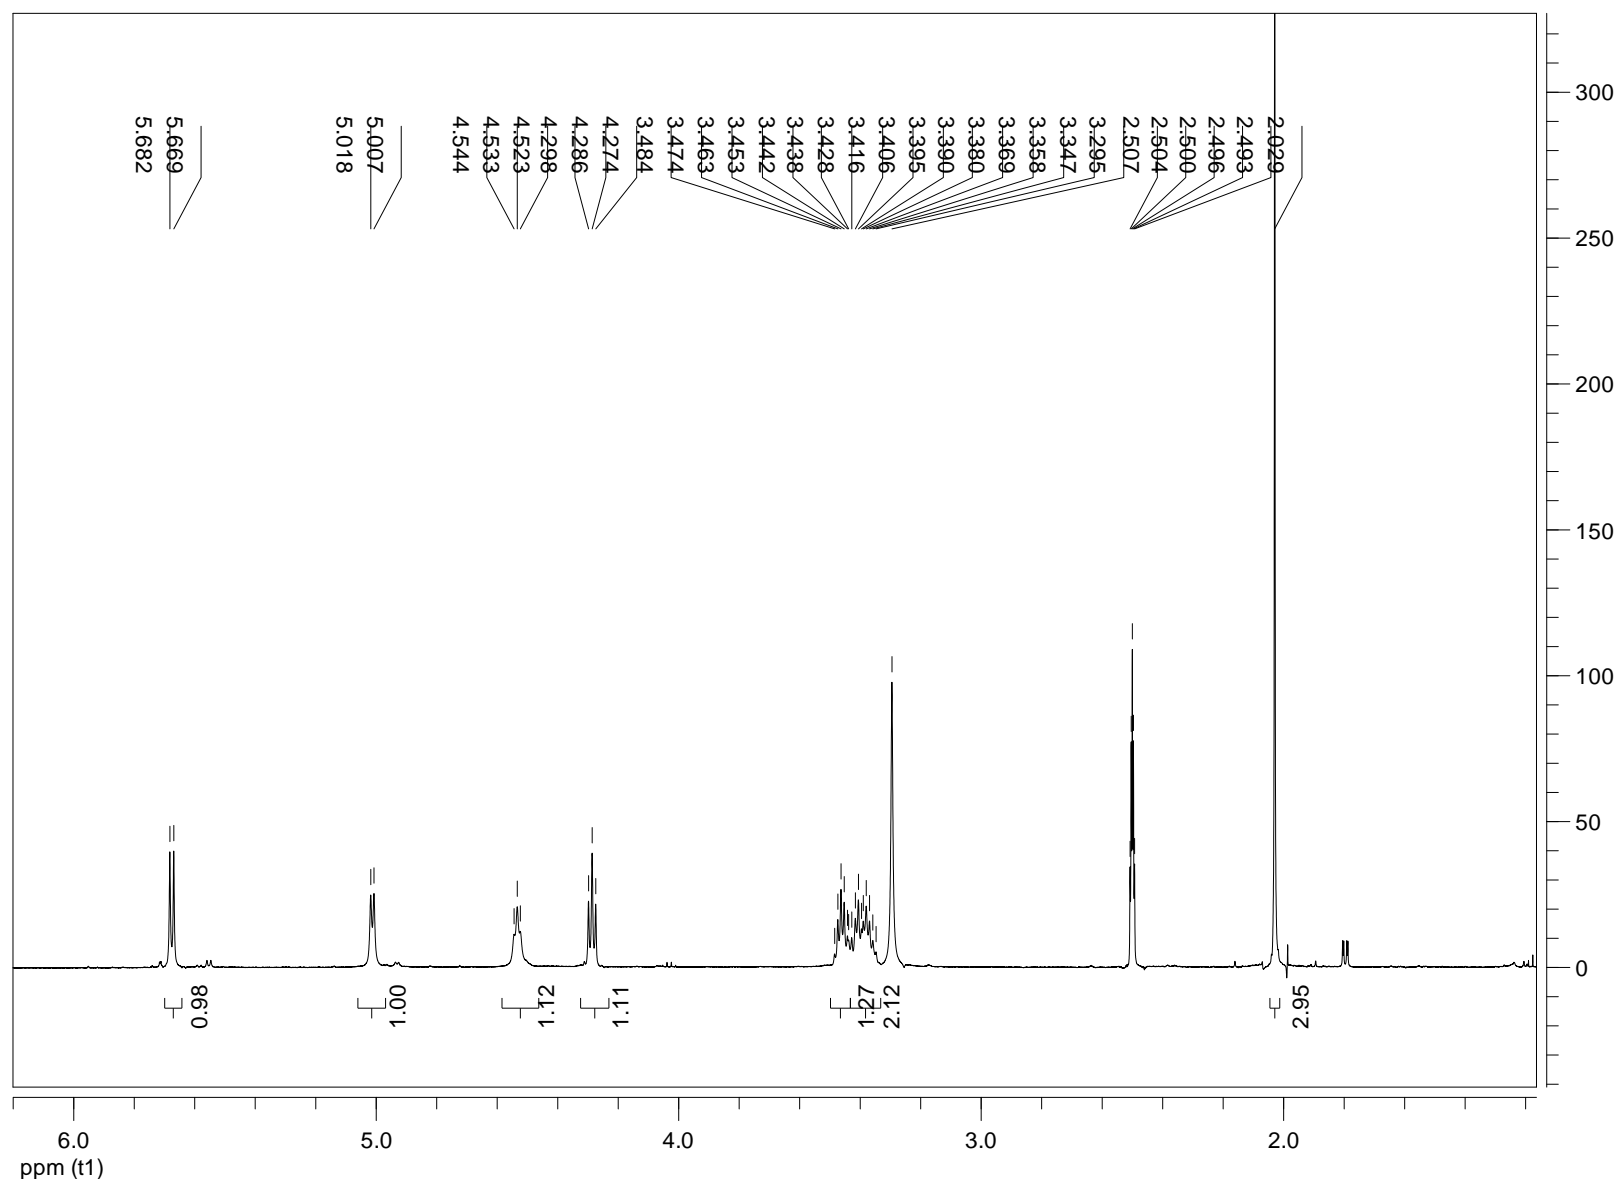

**Figure S13.**  $^{13}\text{C}$  NMR (125 MHz,  $\text{DMSO-}d_6$ ) spectrum of chondrosterin G (4).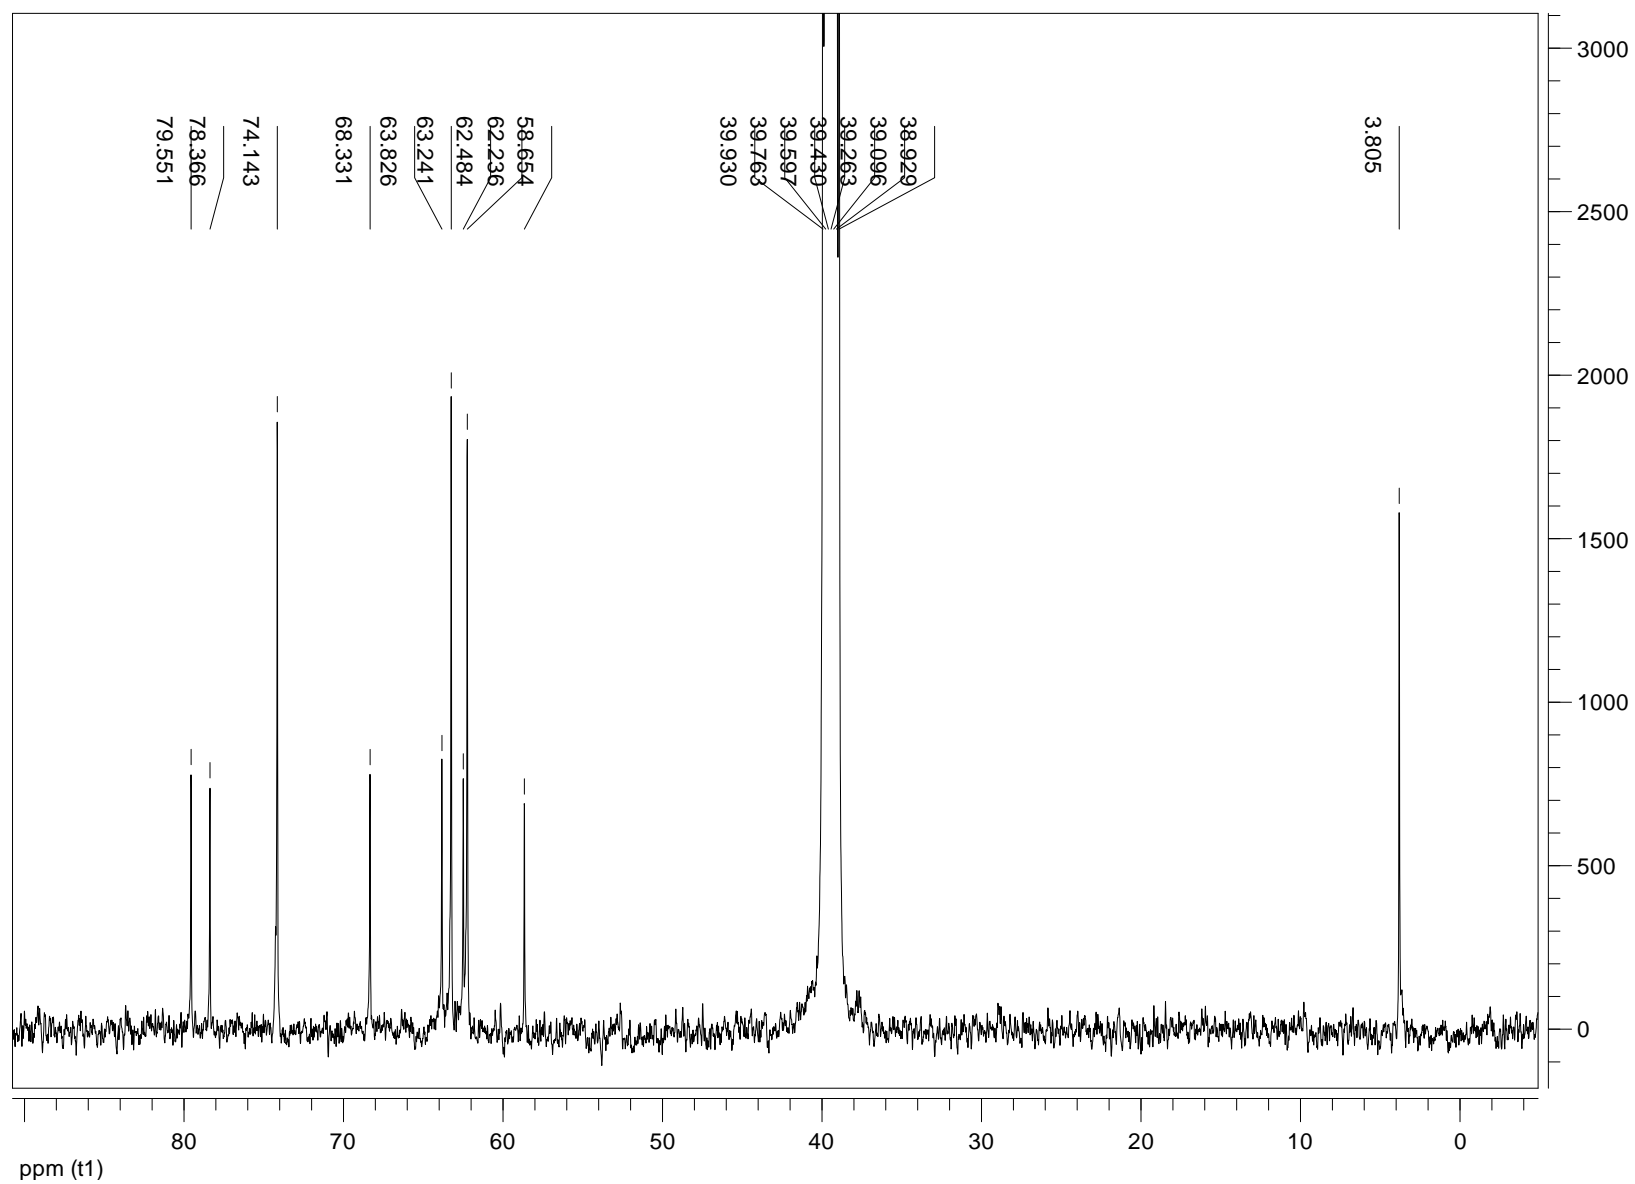

Figure S14. gHMQC spectrum of chondrosterin G (4).

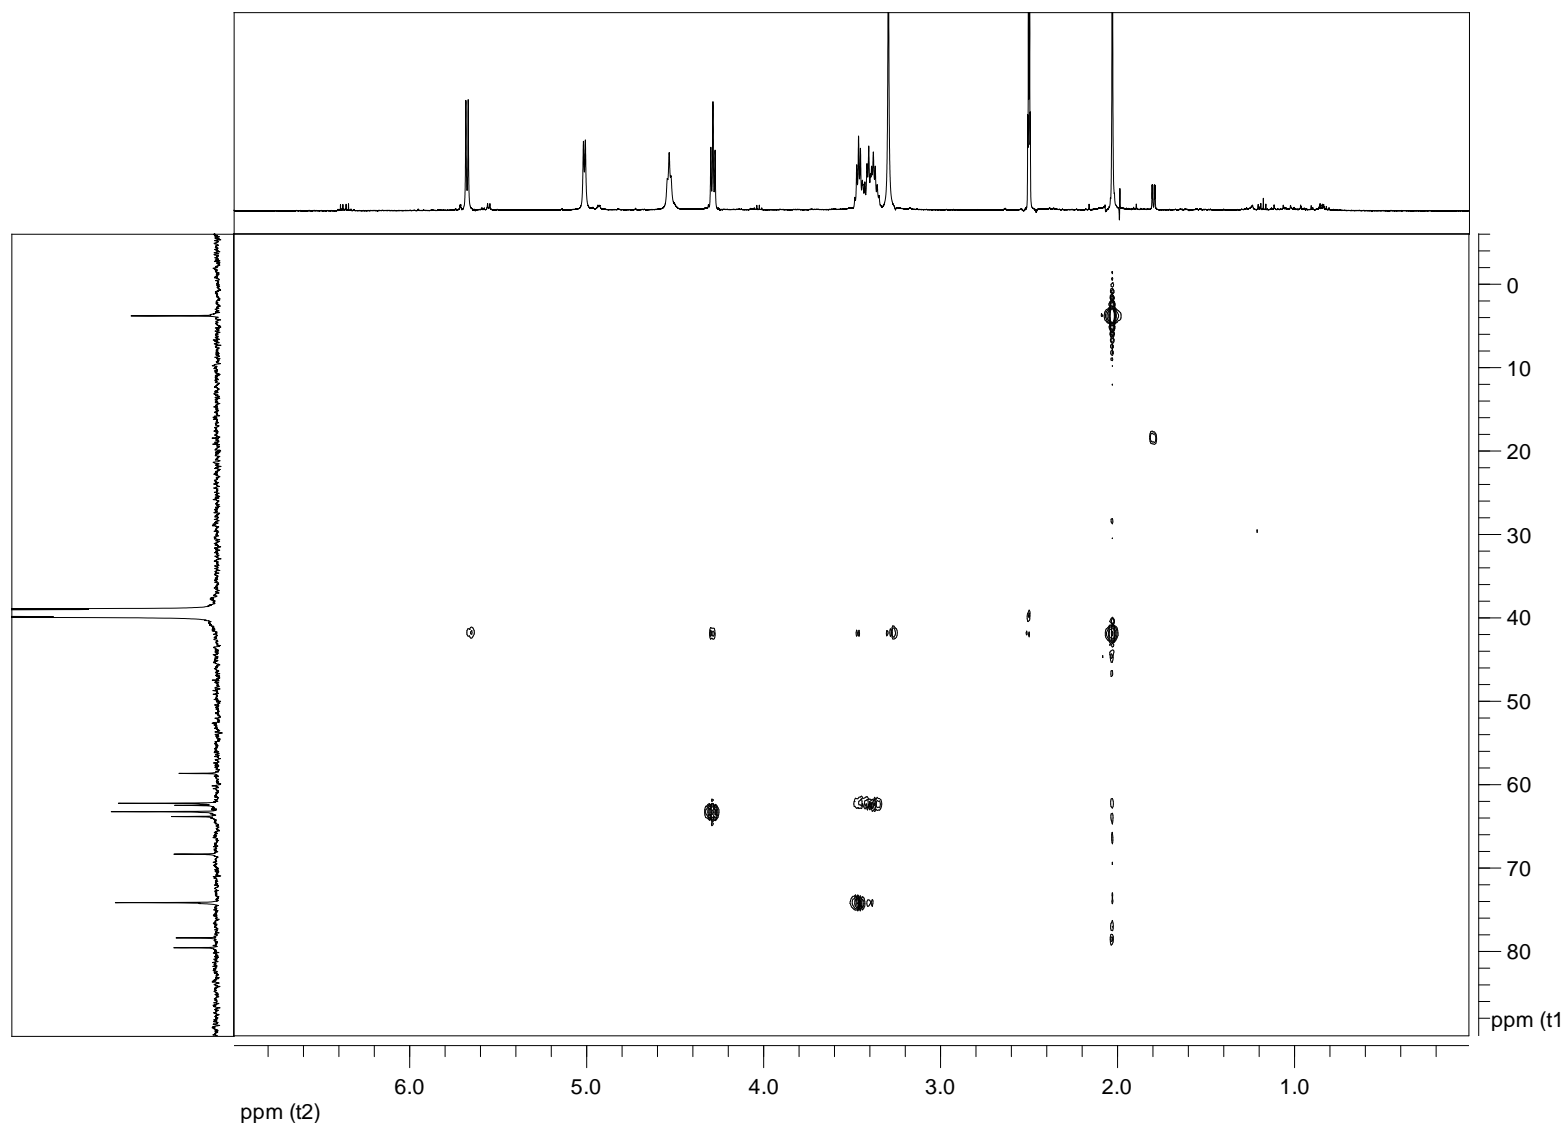



Figure S15. gHMBC spectrum of chondrosterin G (4).

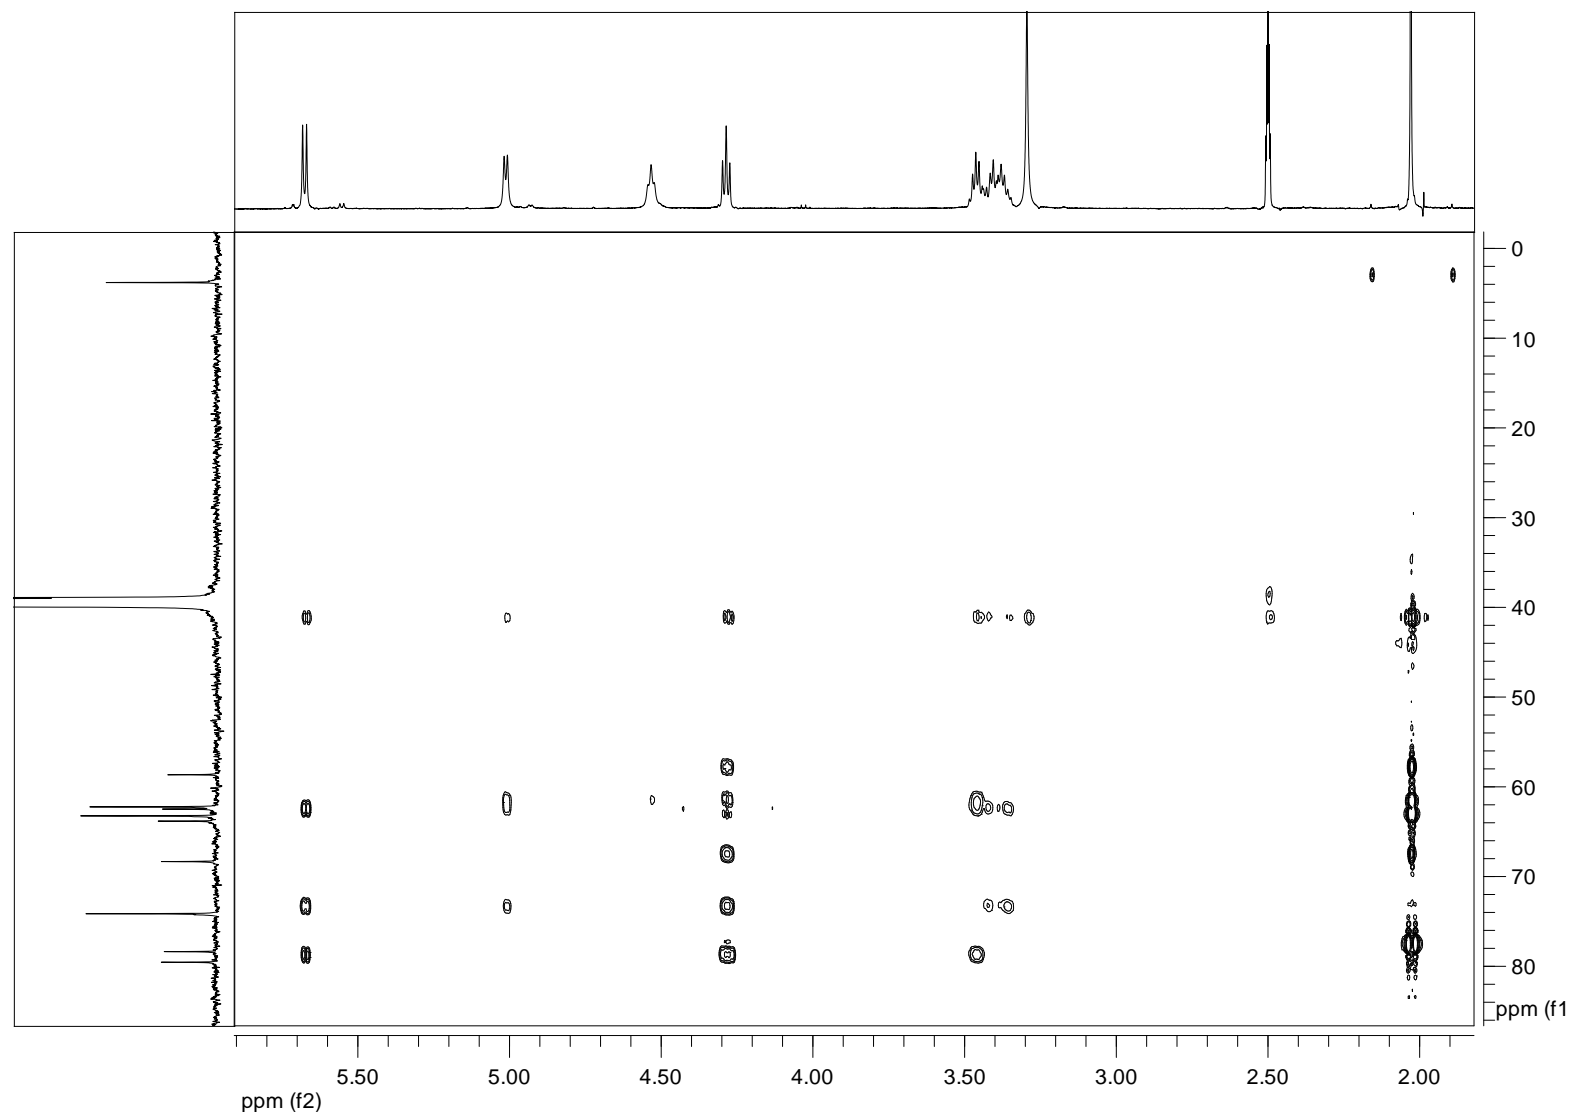

Figure S16.  $^1\text{H}$ - $^1\text{H}$  gCOSY spectrum of chondrosterin G (4).

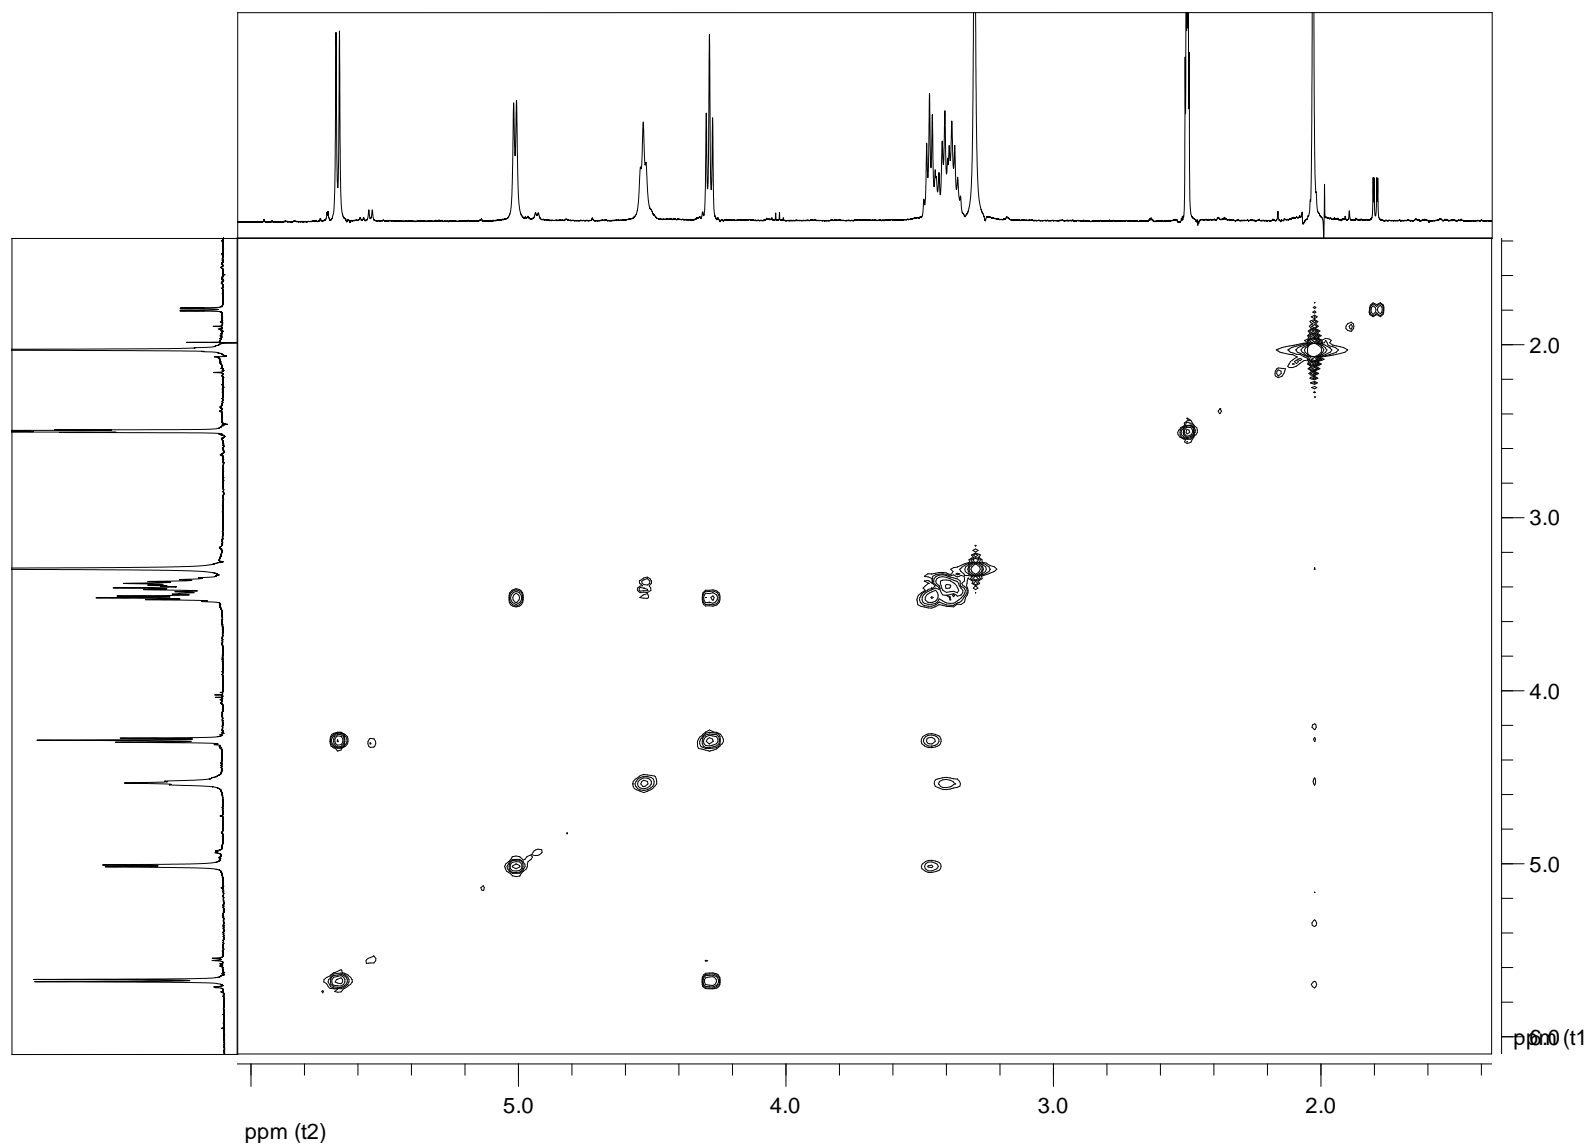

**Figure S17.**  $^1\text{H}$  NMR (400 MHz,  $\text{DMSO-}d_6$ ) spectrum of chondrosterin H (5).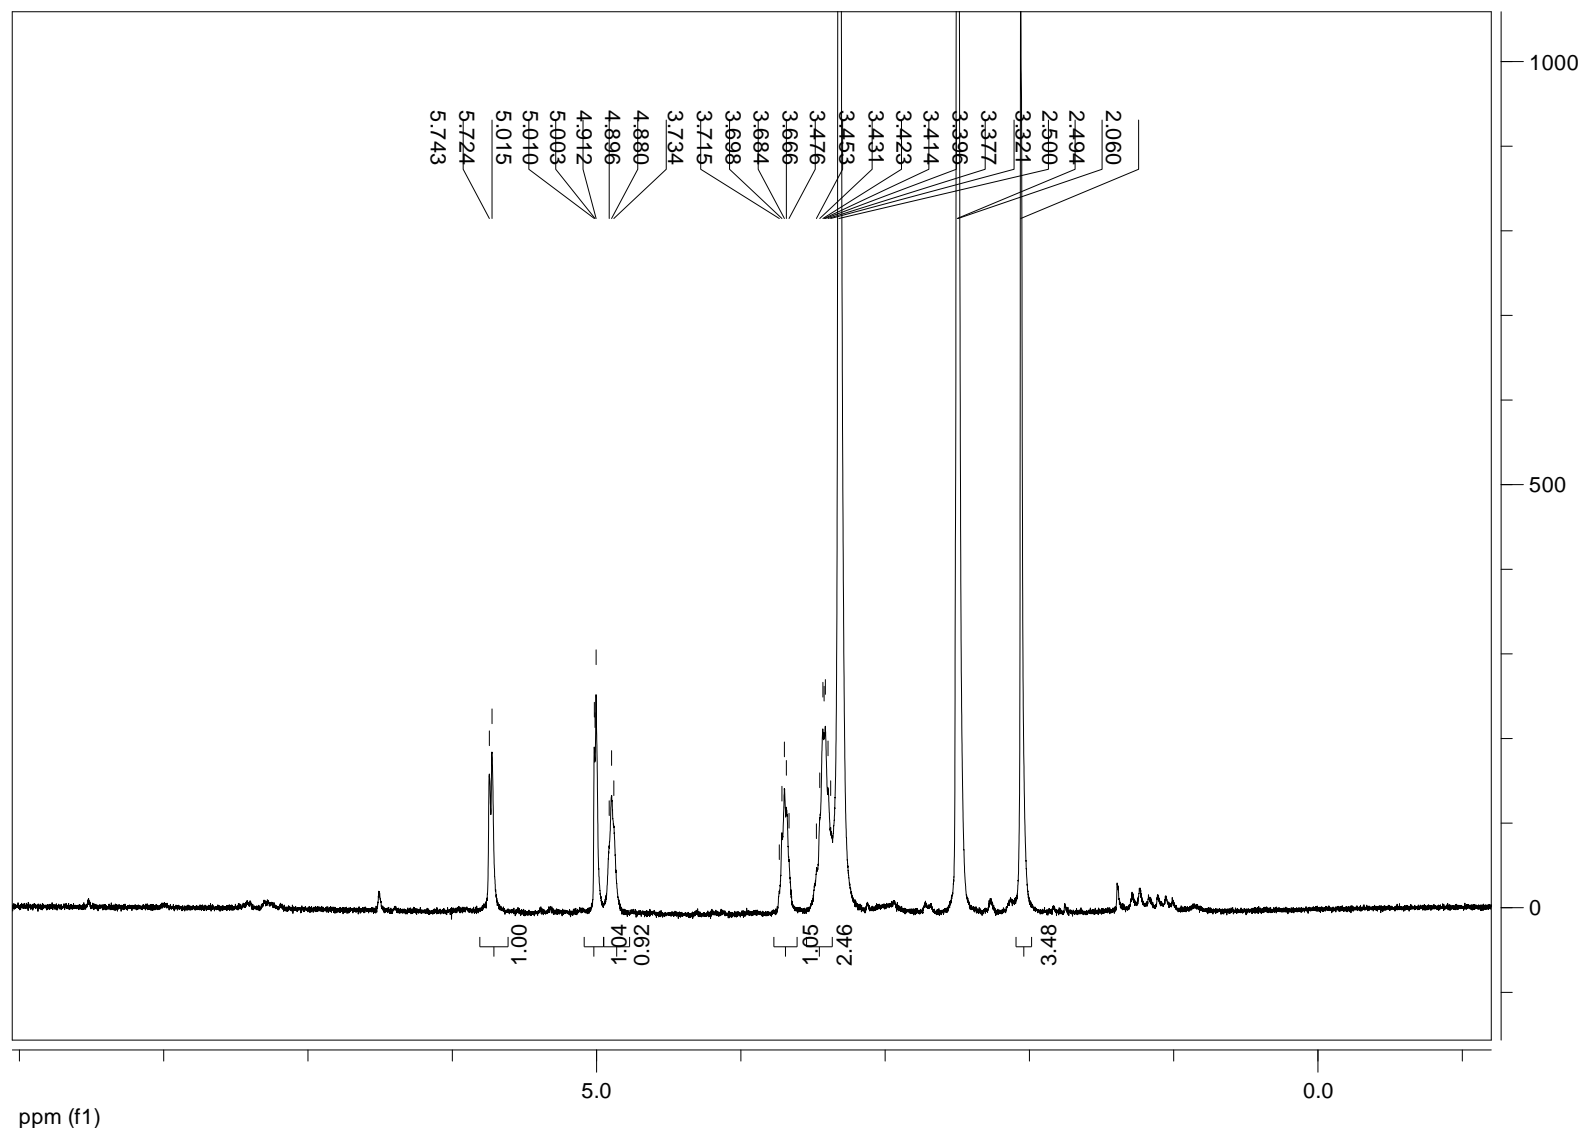

**Figure S18.**  $^{13}\text{C}$  NMR (100 MHz,  $\text{DMSO-}d_6$ ) spectrum of chondrosterin H (**5**).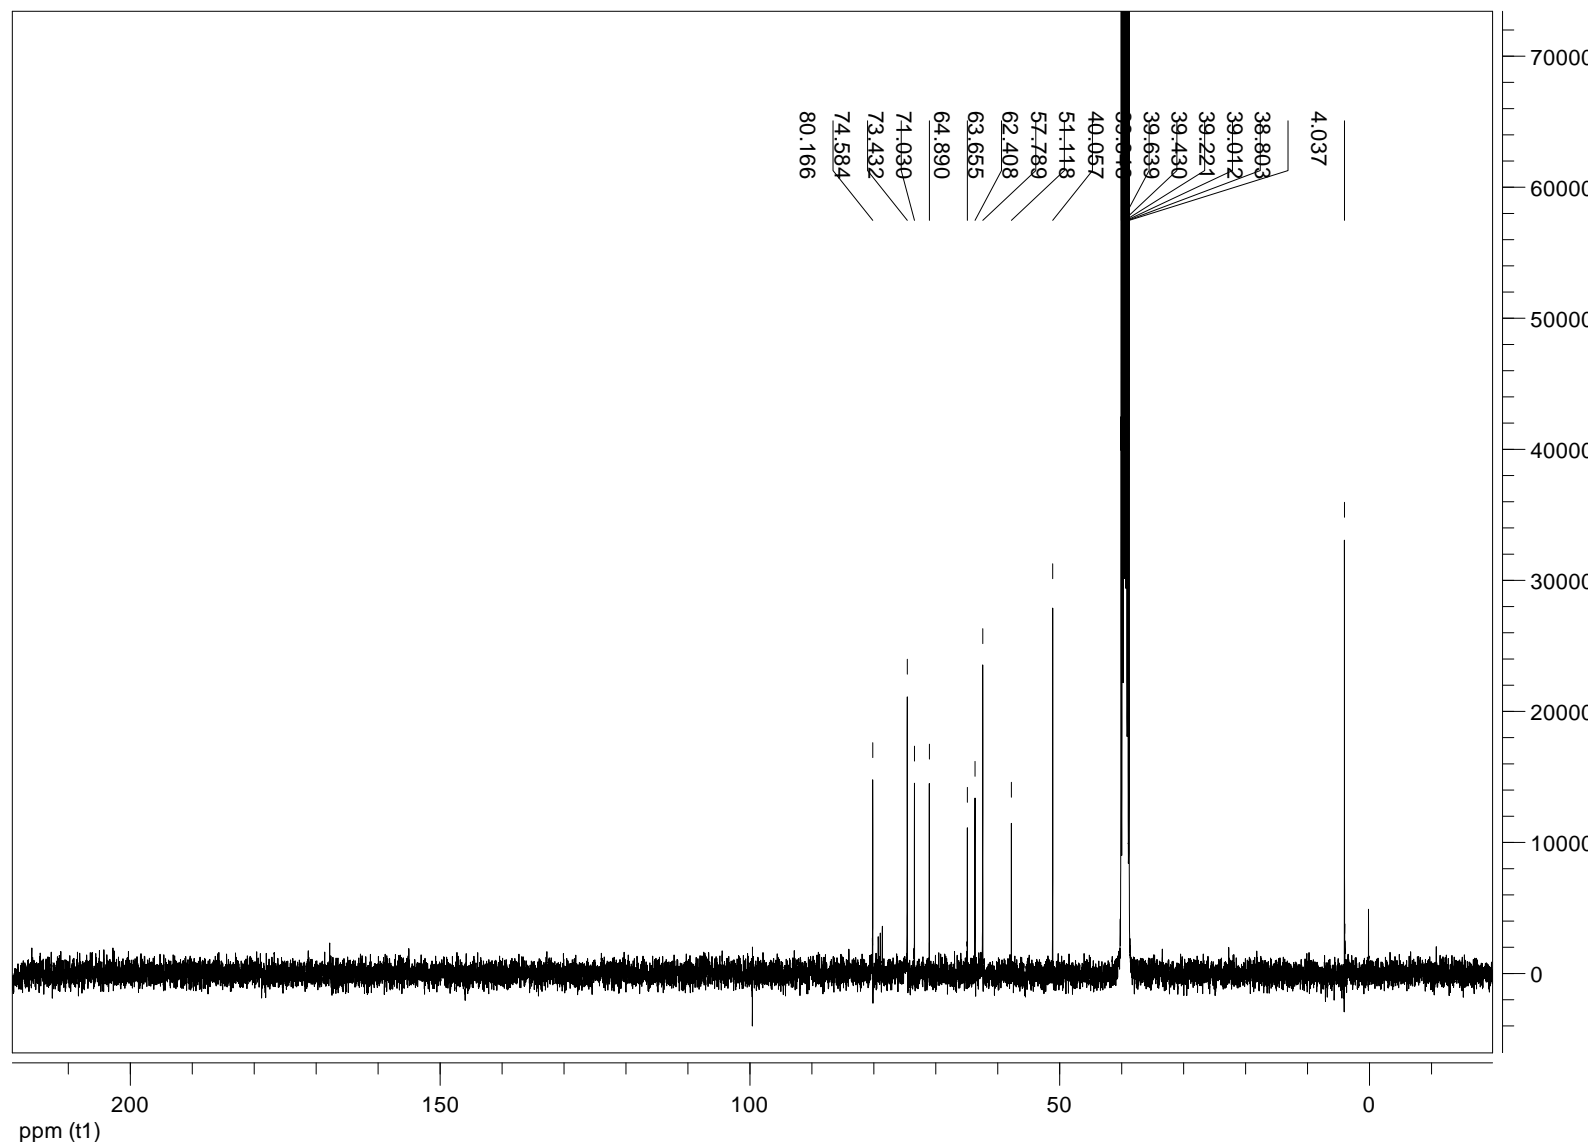

**Figure S19.**  $^1\text{H}$  NMR (500 MHz,  $\text{CDCl}_3$ ) spectrum of chondrosterin H (**5**).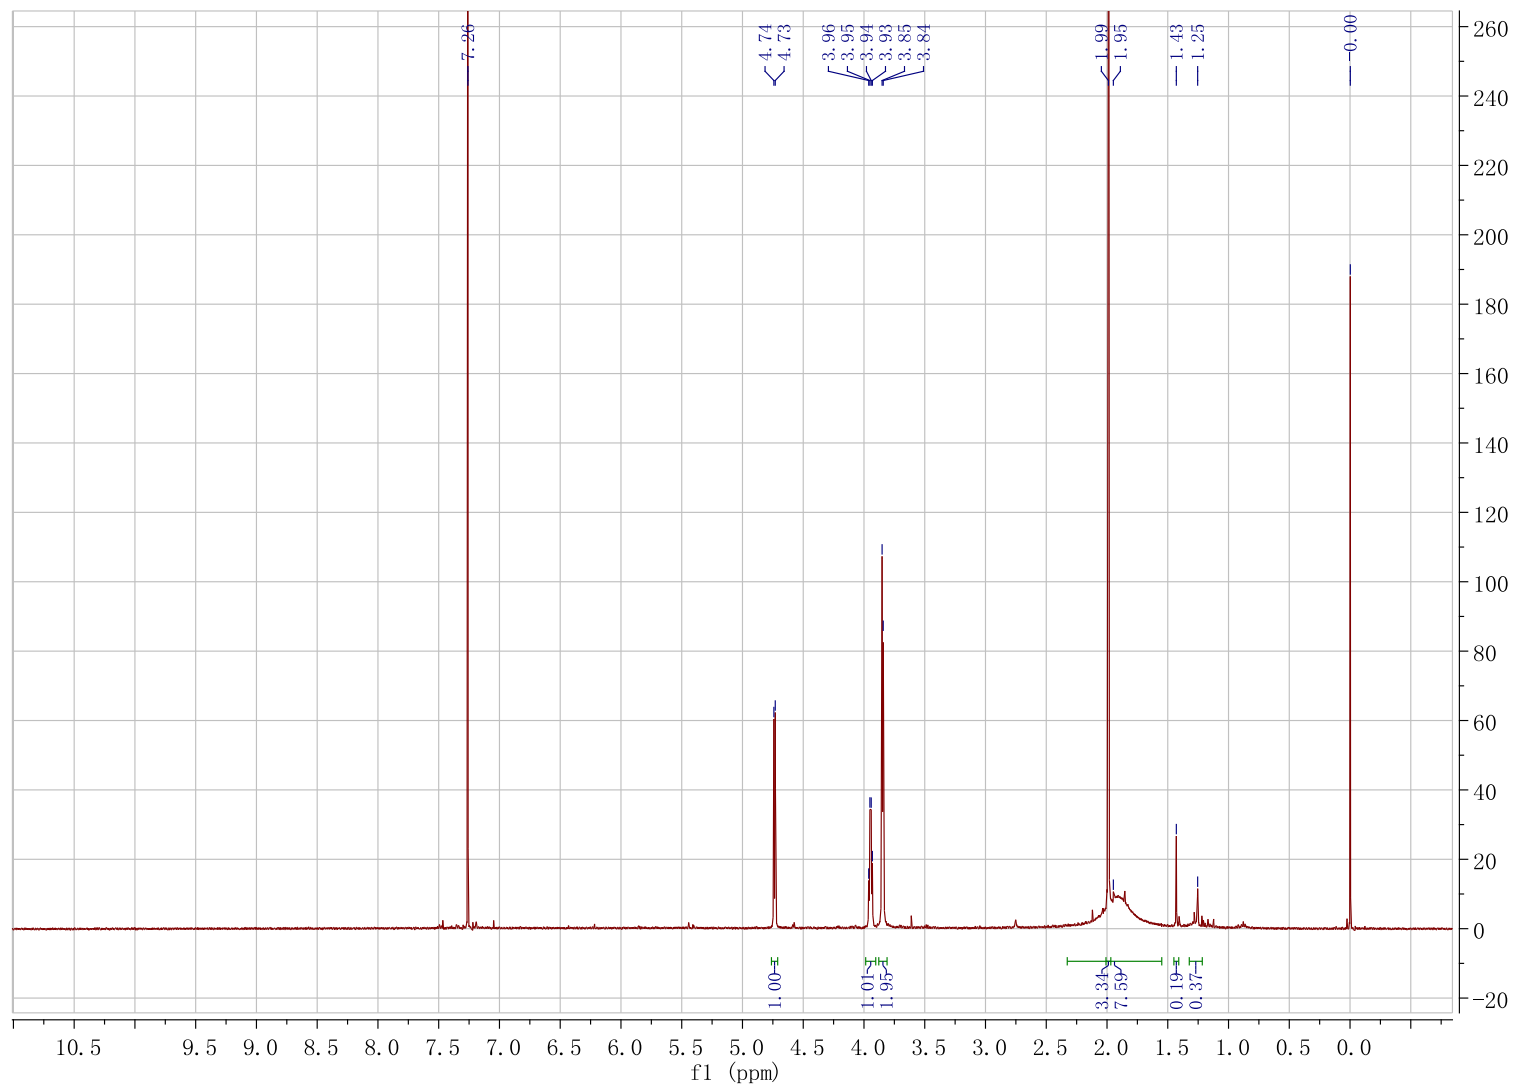

**Figure S20.**  $^{13}\text{C}$  NMR (125 MHz,  $\text{CDCl}_3$ ) spectrum of chondrosterin H (**5**).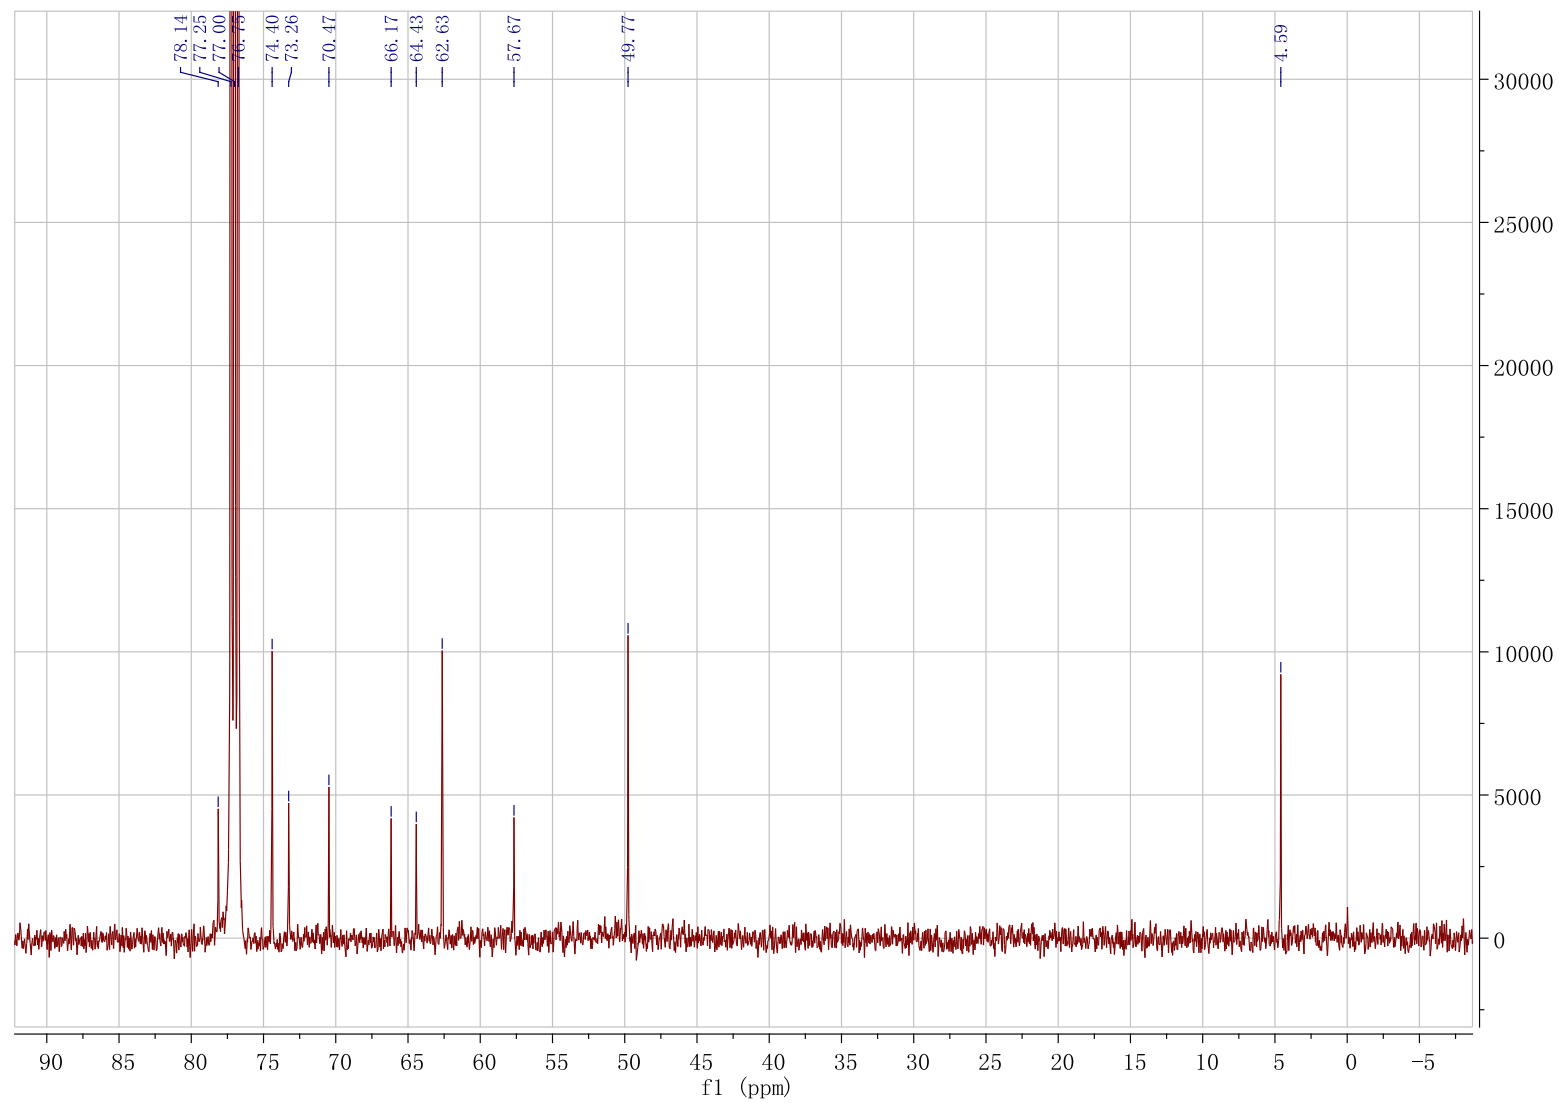

**Figure S21.**  $^1\text{H}$  NMR (500 MHz,  $\text{CDCl}_3$ ) spectrum of dehydromatricarianol (**6**).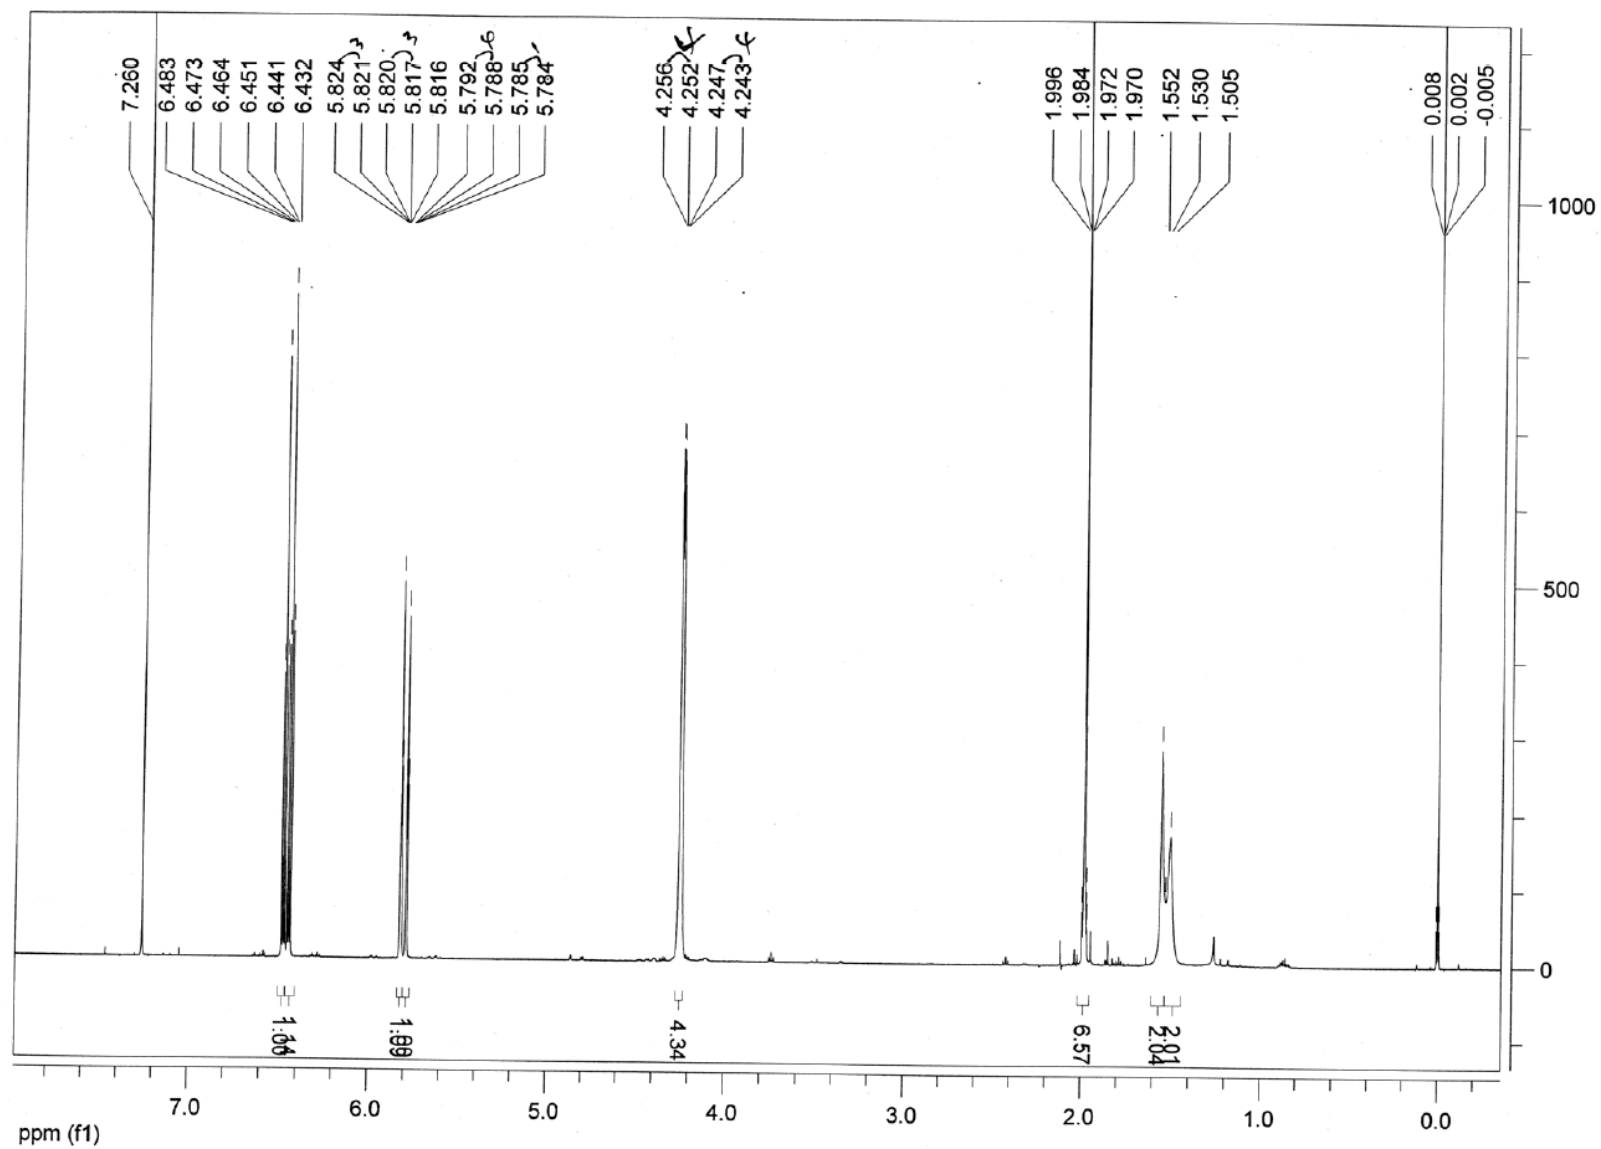

**Figure S22.**  $^{13}\text{C}$  NMR (125 MHz,  $\text{CDCl}_3$ ) spectrum of dehydromatricarianol (**6**).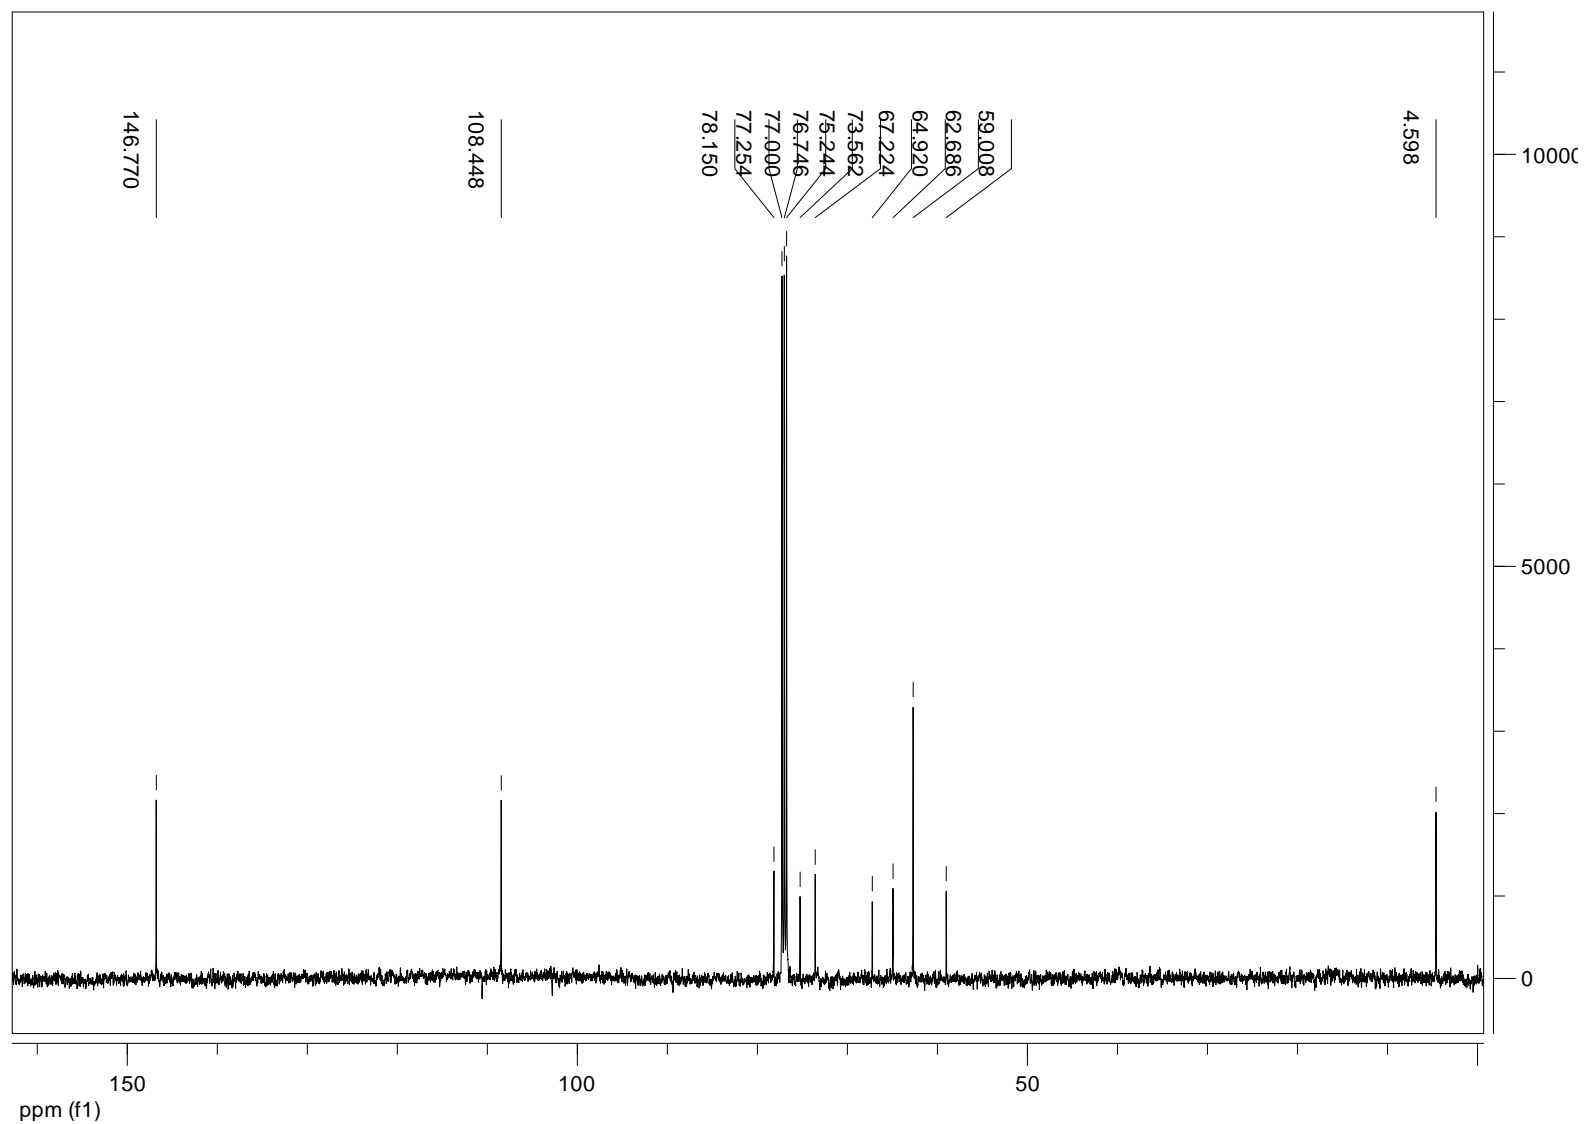

Supplement: marinedrugs-11-00551-s001.pdf [file marinedrugs-11-00551-s001.pdf]
