# Supplementary material for: Isolation and Structural Elucidation of Chondrosterins F–H from the Marine Fungus Chondrostereum sp
Source: MDPI journal article supplement (doi:10.3390/md11020551), 2013-02-22
Supplement: s2 [file s2]

marinedrugs-11-00551-s001.mol
  corina  05201405213D 1   1.00000     0.00000 
CORINA 3.49 0023  12.04.2013
 21 23  0  0  0  0  0  0  0  0999 V2000
   -0.0164    1.3549    0.0095 O   0  0  0  0  0  0  0  0  0  0  0  0
    0.0021   -0.0041    0.0020 C   0  0  0  0  0  0  0  0  0  0  0  0
    1.2710    2.0272    0.0008 C   0  0  0  0  0  0  0  0  0  0  0  0
    2.1193    1.6145    1.2230 C   0  0  0  0  0  0  0  0  0  0  0  0
    1.9615    0.1430    1.4975 C   0  0  0  0  0  0  0  0  0  0  0  0
    0.9876   -0.6160    0.9352 C   0  0  0  0  0  0  0  0  0  0  0  0
    2.8145   -0.7078    2.3989 C   0  0  0  0  0  0  0  0  0  0  0  0
    2.2325   -2.1297    2.3174 C   0  0  0  0  0  0  0  0  0  0  0  0
    1.0633   -2.0080    1.3629 C   0  0  0  0  0  0  0  0  0  0  0  0
    1.0197    3.5344    0.2661 C   0  0  0  0  0  0  0  0  0  0  0  0
    0.8412    3.6327    1.7707 C   0  0  0  0  0  0  0  0  0  0  0  0
    1.5418    2.4384    2.3862 C   0  0  0  0  0  0  0  0  0  0  0  0
   -0.7274   -0.6663   -0.7087 O   0  0  0  0  0  0  0  0  0  0  0  0
    0.3241   -2.9052    1.0171 O   0  0  0  0  0  0  0  0  0  0  0  0
    1.8046    1.8530   -0.9335 H   0  0  0  0  0  0  0  0  0  0  0  0
    3.1685    1.8579    1.0559 H   0  0  0  0  0  0  0  0  0  0  0  0
    3.2753   -3.1023    1.7628 C   0  0  0  0  0  0  0  0  0  0  0  0
    2.6710    2.9101    3.3045 C   0  0  0  0  0  0  0  0  0  0  0  0
    0.5404    1.5952    3.1780 C   0  0  0  0  0  0  0  0  0  0  0  0
    1.7514   -2.5894    3.6951 C   0  0  0  0  0  0  0  0  0  0  0  0
    0.2506    4.5014    2.3663 O   0  0  0  0  0  0  0  0  0  0  0  0
  1  2  1  0      
  1  3  1  0      
  3  4  1  0      
  4  5  1  0      
  5  6  2  0      
  6  2  1  0      
  5  7  1  0      
  7  8  1  0      
  8  9  1  0      
  9  6  1  0      
  3 10  1  0      
 10 11  1  0      
 11 12  1  0      
 12  4  1  0      
  2 13  2  0      
  9 14  2  0      
  3 15  1  0      
  4 16  1  0      
  8 17  1  0      
 12 18  1  0      
 12 19  1  0      
  8 20  1  0      
 11 21  2  0      
M  END
$$$$
