# Supplementary material for: Isolation and Structural Elucidation of Chondrosterins F–H from the Marine Fungus Chondrostereum sp
Source: MDPI journal article supplement (doi:10.3390/md11020551), 2013-02-22
Supplement: s3 [file s3]

marinedrugs-11-00551-s001.mol
  ChemDraw04241410172D

 21 23  0  0  0  0  0  0  0  0999 V2000
   -0.4678    1.0622    0.0000 O   0  0  0  0  0  0  0  0  0  0  0  0
    0.3572    1.0622    0.0000 C   0  0  0  0  0  0  0  0  0  0  0  0
   -0.8803    0.3478    0.0000 C   0  0  0  0  0  0  0  0  0  0  0  0
   -0.4678   -0.3667    0.0000 C   0  0  0  0  0  0  0  0  0  0  0  0
    0.3572   -0.3667    0.0000 C   0  0  0  0  0  0  0  0  0  0  0  0
    0.7697    0.3478    0.0000 C   0  0  0  0  0  0  0  0  0  0  0  0
    0.9093   -0.9798    0.0000 C   0  0  0  0  0  0  0  0  0  0  0  0
    1.6629   -0.6443    0.0000 C   0  0  0  0  0  0  0  0  0  0  0  0
    1.5767    0.1762    0.0000 C   0  0  0  0  0  0  0  0  0  0  0  0
   -1.6872    0.1762    0.0000 C   0  0  0  0  0  0  0  0  0  0  0  0
   -1.7735   -0.6443    0.0000 C   0  0  0  0  0  0  0  0  0  0  0  0
   -1.0198   -0.9798    0.0000 C   0  0  0  0  0  0  0  0  0  0  0  0
    0.7697    1.7767    0.0000 O   0  0  0  0  0  0  0  0  0  0  0  0
    2.2912    0.5887    0.0000 O   0  0  0  0  0  0  0  0  0  0  0  0
   -1.2928    1.0622    0.0000 H   0  0  0  0  0  0  0  0  0  0  0  0
   -0.0553   -1.0812    0.0000 H   0  0  0  0  0  0  0  0  0  0  0  0
    2.4879   -0.6443    0.0000 C   0  0  0  0  0  0  0  0  0  0  0  0
   -1.2333   -1.7767    0.0000 C   0  0  0  0  0  0  0  0  0  0  0  0
   -0.4364   -1.5632    0.0000 C   0  0  0  0  0  0  0  0  0  0  0  0
    2.0754   -1.3587    0.0000 C   0  0  0  0  0  0  0  0  0  0  0  0
   -2.4879   -1.0568    0.0000 O   0  0  0  0  0  0  0  0  0  0  0  0
  1  2  1  0      
  1  3  1  0      
  3  4  1  0      
  4  5  1  0      
  5  6  2  0      
  6  2  1  0      
  5  7  1  0      
  7  8  1  0      
  8  9  1  0      
  9  6  1  0      
  3 10  1  0      
 10 11  1  0      
 11 12  1  0      
 12  4  1  0      
  2 13  2  0      
  9 14  2  0      
  3 15  1  1      
  4 16  1  1      
  8 17  1  1      
 12 18  1  1      
 12 19  1  6      
  8 20  1  6      
 11 21  2  0      
M  END
