# Supplementary material for: Isolation and Structural Elucidation of Chondrosterins F–H from the Marine Fungus Chondrostereum sp
Source: MDPI journal article supplement (doi:10.3390/md11020551), 2013-02-22
Supplement: s4 [file s4]

marinedrugs-11-00551-s002.mol
  corina  05201405213D 1   1.00000     0.00000 
CORINA 3.49 0023  12.04.2013
 18 20  0  0  0  0  0  0  0  0999 V2000
    0.0310    1.4915   -0.1989 C   0  0  0  0  0  0  0  0  0  0  0  0
    0.0489    0.1508   -0.1419 C   0  0  0  0  0  0  0  0  0  0  0  0
    1.3973    2.0351   -0.2443 C   0  0  0  0  0  0  0  0  0  0  0  0
    2.3128    0.9052    0.0601 C   0  0  0  0  0  0  0  0  0  0  0  0
    1.5018   -0.2979   -0.3469 C   0  0  0  0  0  0  0  0  0  0  0  0
    1.5565   -1.4459    0.6561 C   0  0  0  0  0  0  0  0  0  0  0  0
    0.1578   -2.0426    0.5128 C   0  0  0  0  0  0  0  0  0  0  0  0
   -0.6695   -1.0491    0.0983 C   0  0  0  0  0  0  0  0  0  0  0  0
    2.4919   -2.5884    0.2485 C   0  0  0  0  0  0  0  0  0  0  0  0
    1.7269   -3.8240    0.7850 C   0  0  0  0  0  0  0  0  0  0  0  0
    0.2637   -3.4344    0.7512 C   0  0  0  0  0  0  0  0  0  0  0  0
   -0.6700   -4.1944    0.9048 O   0  0  0  0  0  0  0  0  0  0  0  0
    1.7153    3.1850   -0.4846 O   0  0  0  0  0  0  0  0  0  0  0  0
    3.5446    0.9457    0.5666 C   0  0  0  0  0  0  0  0  0  0  0  0
    1.7930   -0.7412   -1.7821 C   0  0  0  0  0  0  0  0  0  0  0  0
    1.9744   -5.0341   -0.1180 C   0  0  0  0  0  0  0  0  0  0  0  0
    2.1601   -4.1341    2.2193 C   0  0  0  0  0  0  0  0  0  0  0  0
    1.8088   -0.9801    1.9833 O   0  0  0  0  0  0  0  0  0  0  0  0
  1  2  2  0      
  1  3  1  0      
  3  4  1  0      
  4  5  1  0      
  5  2  1  0      
  5  6  1  0      
  6  7  1  0      
  7  8  2  0      
  8  2  1  0      
  6  9  1  0      
  9 10  1  0      
 10 11  1  0      
 11  7  1  0      
 11 12  2  0      
  3 13  2  0      
  4 14  2  0      
  5 15  1  0      
 10 16  1  0      
 10 17  1  0      
  6 18  1  0      
M  END
$$$$
