# Supplementary material for: Isolation and Structural Elucidation of Chondrosterins F–H from the Marine Fungus Chondrostereum sp
Source: MDPI journal article supplement (doi:10.3390/md11020551), 2013-02-22
Supplement: s6 [file s6]

marinedrugs-11-00551-s003.mol
  corina  05201405213D 1   1.00000     0.00000 
CORINA 3.49 0023  12.04.2013
 19 21  0  0  0  0  0  0  0  0999 V2000
   -0.2974    1.3573    0.0622 C   0  0  0  0  0  0  0  0  0  0  0  0
   -0.1584   -0.1768    0.1976 C   0  0  0  0  0  0  0  0  0  0  0  0
    1.1276    1.8050   -0.2442 C   0  0  0  0  0  0  0  0  0  0  0  0
    2.0066    0.9216    0.6227 C   0  0  0  0  0  0  0  0  0  0  0  0
    1.2056   -0.3606    0.9143 C   0  0  0  0  0  0  0  0  0  0  0  0
    0.9056   -0.4293    2.4192 C   0  0  0  0  0  0  0  0  0  0  0  0
   -0.6262   -0.2508    2.5793 C   0  0  0  0  0  0  0  0  0  0  0  0
   -1.2033   -0.6877    1.2126 C   0  0  0  0  0  0  0  0  0  0  0  0
    1.1759   -1.8658    2.9252 C   0  0  0  0  0  0  0  0  0  0  0  0
    0.1955   -2.0039    4.1158 C   0  0  0  0  0  0  0  0  0  0  0  0
   -1.0731   -1.2614    3.6492 C   0  0  0  0  0  0  0  0  0  0  0  0
    1.4795    2.6711   -1.0085 O   0  0  0  0  0  0  0  0  0  0  0  0
    1.9399   -1.6070    0.4159 C   0  0  0  0  0  0  0  0  0  0  0  0
   -0.1152   -3.4775    4.3855 C   0  0  0  0  0  0  0  0  0  0  0  0
    0.7751   -1.3399    5.3665 C   0  0  0  0  0  0  0  0  0  0  0  0
    1.4631    0.3227    2.9775 H   0  0  0  0  0  0  0  0  0  0  0  0
    3.2959    0.5738   -0.1241 C   0  0  0  0  0  0  0  0  0  0  0  0
   -0.2198   -0.8498   -1.0615 O   0  0  0  0  0  0  0  0  0  0  0  0
   -0.9800    1.0946    2.9057 O   0  0  0  0  0  0  0  0  0  0  0  0
  1  2  1  0      
  1  3  1  0      
  3  4  1  0      
  4  5  1  0      
  5  2  1  0      
  5  6  1  0      
  6  7  1  0      
  7  8  1  0      
  8  2  1  0      
  6  9  1  0      
  9 10  1  0      
 10 11  1  0      
 11  7  1  0      
  3 12  2  0      
  5 13  1  0      
 10 14  1  0      
 10 15  1  0      
  6 16  1  0      
  4 17  1  0      
  2 18  1  0      
  7 19  1  0      
M  END
$$$$
