# Supplementary material for: Isolation and Structural Elucidation of Chondrosterins F–H from the Marine Fungus Chondrostereum sp
Source: MDPI journal article supplement (doi:10.3390/md11020551), 2013-02-22
Supplement: s7 [file s7]

marinedrugs-11-00551-s003.mol
  ChemDraw04241410182D

 19 21  0  0  0  0  0  0  0  0999 V2000
   -1.4512    0.6900    0.0000 C   0  0  0  0  0  0  0  0  0  0  0  0
   -0.6262    0.6900    0.0000 C   0  0  0  0  0  0  0  0  0  0  0  0
   -1.7062   -0.0946    0.0000 C   0  0  0  0  0  0  0  0  0  0  0  0
   -1.0387   -0.5795    0.0000 C   0  0  0  0  0  0  0  0  0  0  0  0
   -0.3713   -0.0946    0.0000 C   0  0  0  0  0  0  0  0  0  0  0  0
    0.4537   -0.0946    0.0000 C   0  0  0  0  0  0  0  0  0  0  0  0
    0.7086    0.6900    0.0000 C   0  0  0  0  0  0  0  0  0  0  0  0
    0.0412    1.1750    0.0000 C   0  0  0  0  0  0  0  0  0  0  0  0
    1.1211   -0.5795    0.0000 C   0  0  0  0  0  0  0  0  0  0  0  0
    1.7886   -0.0946    0.0000 C   0  0  0  0  0  0  0  0  0  0  0  0
    1.5336    0.6900    0.0000 C   0  0  0  0  0  0  0  0  0  0  0  0
   -2.5031   -0.3081    0.0000 O   0  0  0  0  0  0  0  0  0  0  0  0
   -0.3713   -0.9196    0.0000 C   0  0  0  0  0  0  0  0  0  0  0  0
    2.5031    0.3179    0.0000 C   0  0  0  0  0  0  0  0  0  0  0  0
    2.2011   -0.8091    0.0000 C   0  0  0  0  0  0  0  0  0  0  0  0
    0.4537   -0.9196    0.0000 H   0  0  0  0  0  0  0  0  0  0  0  0
   -1.0387   -1.4045    0.0000 C   0  0  0  0  0  0  0  0  0  0  0  0
   -1.0387    1.4045    0.0000 O   0  0  0  0  0  0  0  0  0  0  0  0
    1.1211    1.4045    0.0000 O   0  0  0  0  0  0  0  0  0  0  0  0
  1  2  1  0      
  1  3  1  0      
  3  4  1  0      
  4  5  1  0      
  5  2  1  0      
  5  6  1  0      
  6  7  1  0      
  7  8  1  0      
  8  2  1  0      
  6  9  1  0      
  9 10  1  0      
 10 11  1  0      
 11  7  1  0      
  3 12  2  0      
  5 13  1  1      
 10 14  1  1      
 10 15  1  6      
  6 16  1  6      
  4 17  1  1      
  2 18  1  1      
  7 19  1  6      
M  END
