# Supplementary material for: Isolation and Structural Elucidation of Chondrosterins F–H from the Marine Fungus Chondrostereum sp
Source: MDPI journal article supplement (doi:10.3390/md11020551), 2013-02-22
Supplement: s10 [file s10]

marinedrugs-11-00551-s005.mol
  corina  05201405223D 1   1.00000     0.00000 
CORINA 3.49 0023  12.04.2013
 13 12  0  0  0  0  0  0  0  0999 V2000
   -0.0179    1.4678    0.0101 C   0  0  0  0  0  0  0  0  0  0  0  0
    0.0021   -0.0041    0.0020 C   0  0  0  0  0  0  0  0  0  0  0  0
    0.0180   -1.1779   -0.0044 C   0  0  0  0  0  0  0  0  0  0  0  0
    0.0367   -2.5548   -0.0120 C   0  0  0  0  0  0  0  0  0  0  0  0
    0.0526   -3.7287   -0.0185 C   0  0  0  0  0  0  0  0  0  0  0  0
    0.0713   -5.1055   -0.0260 C   0  0  0  0  0  0  0  0  0  0  0  0
    0.0872   -6.2794   -0.0325 C   0  0  0  0  0  0  0  0  0  0  0  0
    0.1071   -7.7512   -0.0406 C   0  0  0  0  0  0  0  0  0  0  0  0
   -1.3282   -8.2808   -0.0297 C   0  0  0  0  0  0  0  0  0  0  0  0
   -1.3082   -9.8062    0.0876 C   0  0  0  0  0  0  0  0  0  0  0  0
    0.9511   -8.3327   -1.5240 Cl  0  0  0  0  0  0  0  0  0  0  0  0
   -2.0320   -7.7266    1.0837 O   0  0  0  0  0  0  0  0  0  0  0  0
   -2.6413  -10.3097   -0.0192 O   0  0  0  0  0  0  0  0  0  0  0  0
  1  2  1  0      
  2  3  3  0      
  3  4  1  0      
  4  5  3  0      
  5  6  1  0      
  6  7  3  0      
  7  8  1  0      
  8  9  1  0      
  9 10  1  0      
  8 11  1  0      
  9 12  1  0      
 10 13  1  0      
M  END
$$$$
