# Supplementary material for: Isolation and Structural Elucidation of Chondrosterins F–H from the Marine Fungus Chondrostereum sp
Source: MDPI journal article supplement (doi:10.3390/md11020551), 2013-02-22
Supplement: s11 [file s11]

marinedrugs-11-00551-s005.mol
  ChemDraw04241410182D

 13 12  0  0  0  0  0  0  0  0999 V2000
   -3.9592   -0.2203    0.0000 C   0  0  0  0  0  0  0  0  0  0  0  0
   -3.1342   -0.2203    0.0000 C   0  0  0  0  0  0  0  0  0  0  0  0
   -2.3092   -0.2203    0.0000 C   0  0  0  0  0  0  0  0  0  0  0  0
   -1.4842   -0.2203    0.0000 C   0  0  0  0  0  0  0  0  0  0  0  0
   -0.6592   -0.2203    0.0000 C   0  0  0  0  0  0  0  0  0  0  0  0
    0.1658   -0.2203    0.0000 C   0  0  0  0  0  0  0  0  0  0  0  0
    0.9908   -0.2203    0.0000 C   0  0  0  0  0  0  0  0  0  0  0  0
    1.8158   -0.2203    0.0000 C   0  0  0  0  0  0  0  0  0  0  0  0
    2.5303    0.1922    0.0000 C   0  0  0  0  0  0  0  0  0  0  0  0
    3.2447   -0.2203    0.0000 C   0  0  0  0  0  0  0  0  0  0  0  0
    2.0293   -1.0172    0.0000 Cl  0  0  0  0  0  0  0  0  0  0  0  0
    2.5303    1.0172    0.0000 O   0  0  0  0  0  0  0  0  0  0  0  0
    3.9592    0.1922    0.0000 O   0  0  0  0  0  0  0  0  0  0  0  0
  1  2  1  0      
  2  3  3  0      
  3  4  1  0      
  4  5  3  0      
  5  6  1  0      
  6  7  3  0      
  7  8  1  0      
  8  9  1  0      
  9 10  1  0      
  8 11  1  0      
  9 12  1  0      
 10 13  1  0      
M  END
